# Supplementary material for: 8-Amino-6-Methoxyquinoline—Tetrazole Hybrids: Impact of Linkers on Antiplasmodial Activity
Source: Molecules. 2021 Sep 12;26(18):5530. doi: 10.3390/molecules26185530 (PMC8470823; doi:10.3390/molecules26185530)

## Supplementary Information

# 8-Amino-6-methoxyquinoline – Tetrazole hybrids: Impact of linkers on Antiplasmodial Activity

Patrick Hochegger <sup>1,\*</sup>, Johanna Dolensky <sup>1</sup>, Werner Seebacher <sup>1</sup>, Robert Saf <sup>2</sup>, Marcel Kaiser <sup>3</sup>, Pascal Mäser <sup>3</sup> and Robert Weis <sup>1</sup>

<sup>1</sup> Institute of Pharmaceutical Sciences, Pharmaceutical Chemistry, University of Graz, Schubertstraße 1, A-8010 Graz, Austria; [theresa.hermann@uni-graz.at](mailto:theresa.hermann@uni-graz.at); [patrick.hochegger@uni-graz.at](mailto:patrick.hochegger@uni-graz.at); [we.seebacher@uni-graz.at](mailto:we.seebacher@uni-graz.at); [robert.weis@uni-graz.at](mailto:robert.weis@uni-graz.at)

<sup>2</sup> Institute for Chemistry and Technology of Materials (ICTM), Graz University of Technology, Stremayrgasse 9, A-8010 Graz, Austria; [robert.saf@tugraz.at](mailto:robert.saf@tugraz.at)

<sup>3</sup> Swiss Tropical and Public Health Institute, Socinstrasse 57, CH-4002 Basel, Switzerland; [marcel.kaiser@swisstph.ch](mailto:marcel.kaiser@swisstph.ch); [pascal.maeser@swisstph.ch](mailto:pascal.maeser@swisstph.ch)

\* Correspondence: [patrick.hochegger@uni-graz.at](mailto:patrick.hochegger@uni-graz.at); Tel.: +43-316-380-5379; fax: +43-316-380-9846

---

### NMR spectra data of compounds 3–22

**Figure S1.**  $^1\text{H}$  NMR at 400 MHz and  $^{13}\text{C}$  NMR at 100 MHz spectra for compound **3**

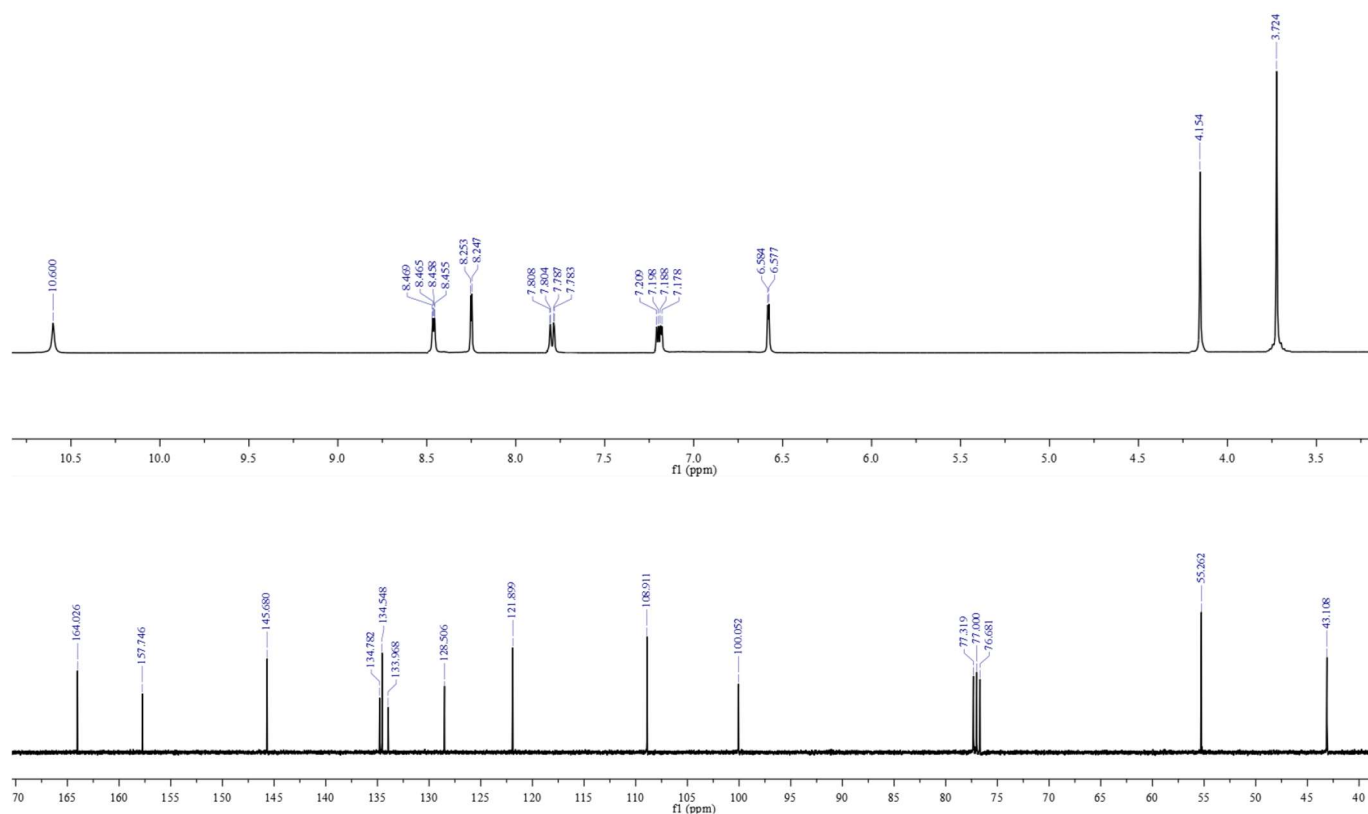

Figure S2. <sup>1</sup>H NMR at 400 MHz and <sup>13</sup>C NMR at 100 MHz spectra for compound 4

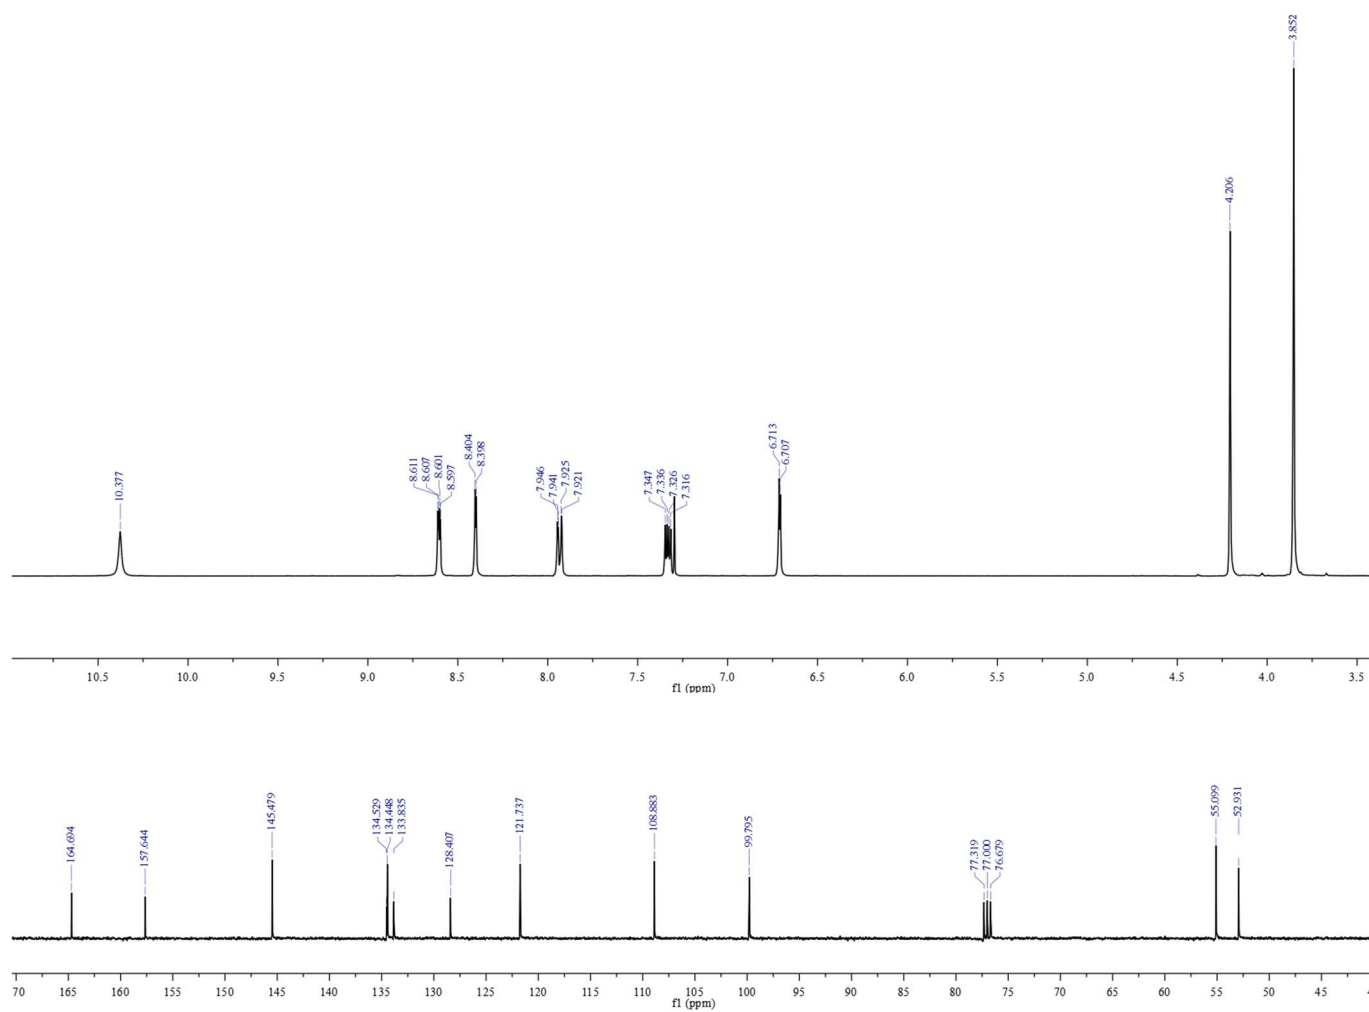

Figure S3. <sup>1</sup>H NMR at 400 MHz and <sup>13</sup>C NMR at 100 MHz spectra for compound 5

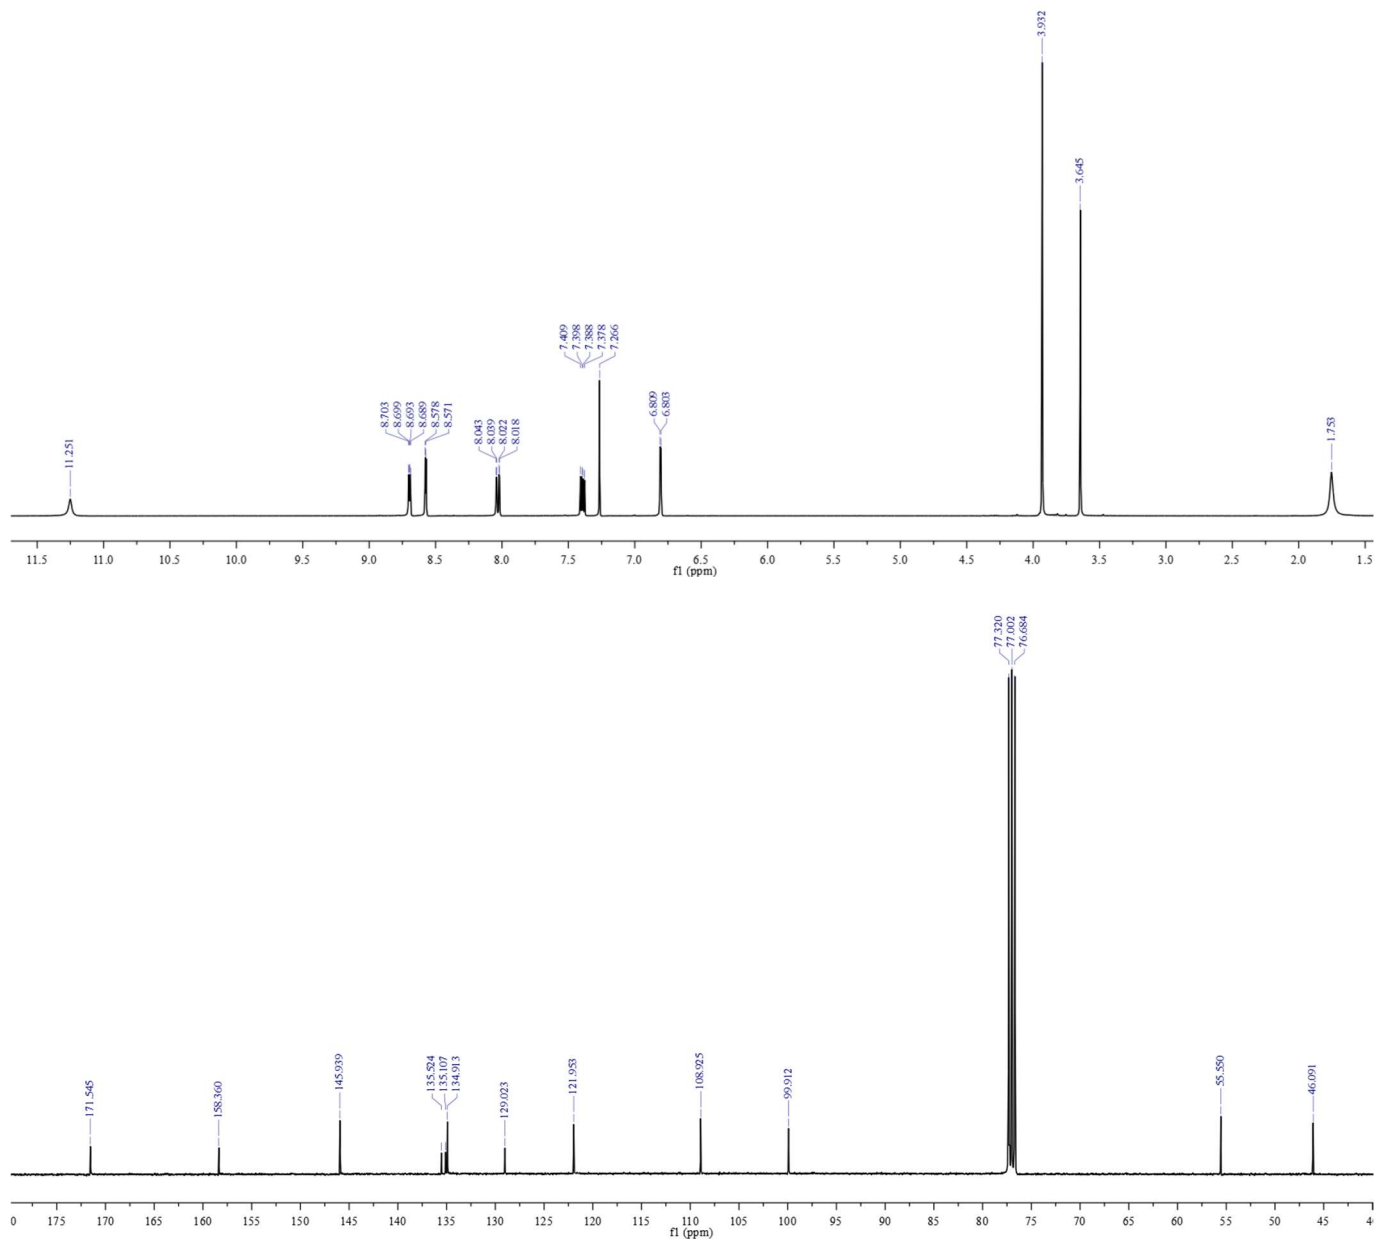

**Figure S4.**  $^1\text{H}$  NMR at 400 MHz and  $^{13}\text{C}$  NMR at 100 MHz spectra for compound **6**

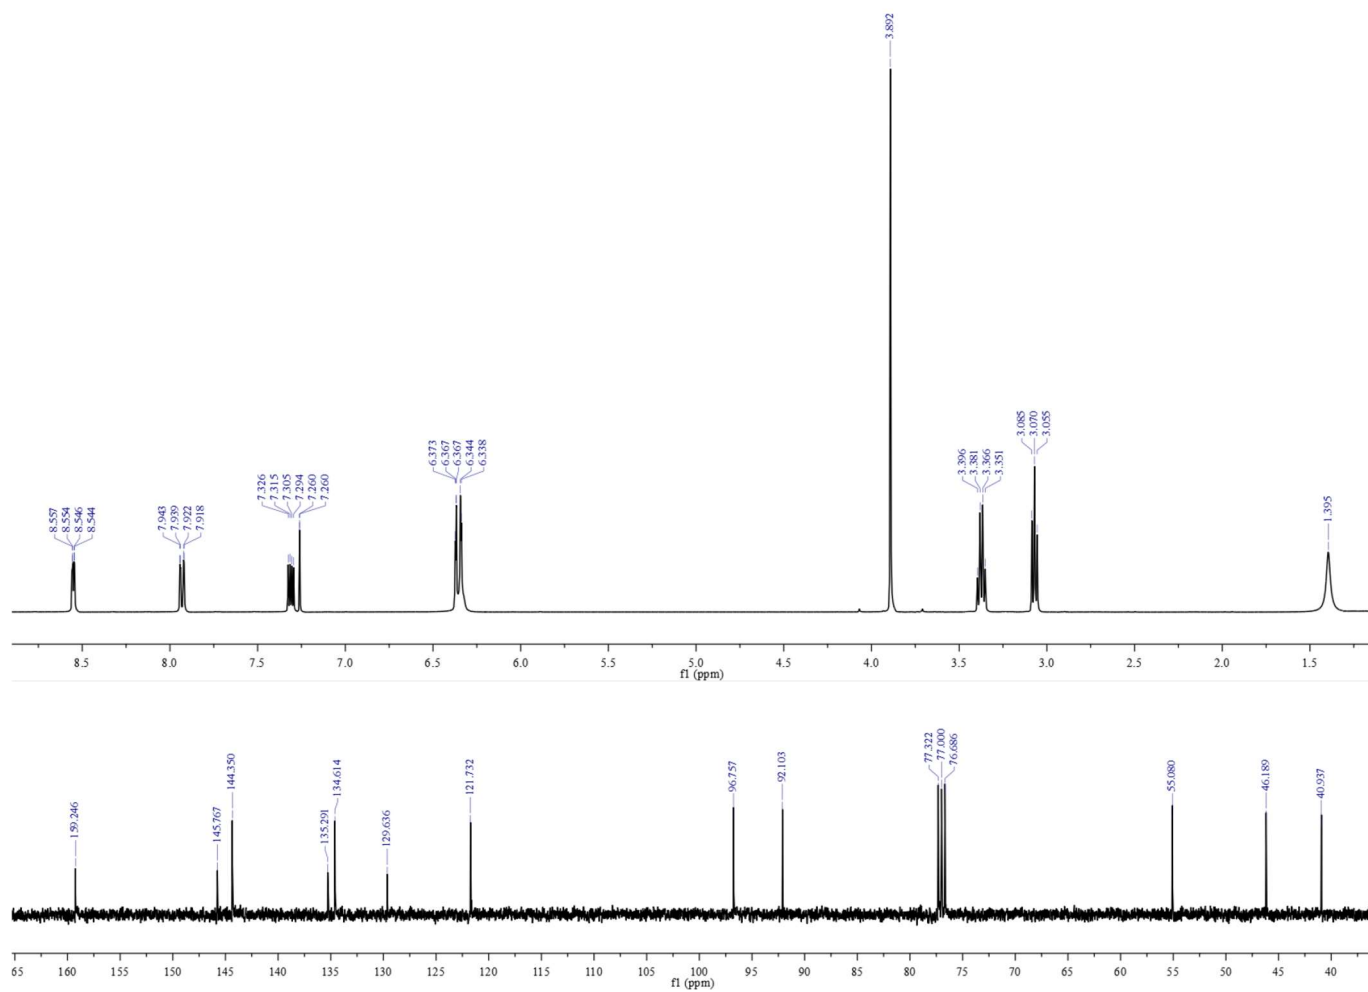

Figure S5. <sup>1</sup>H NMR at 400 MHz and <sup>13</sup>C NMR at 100 MHz spectra for compound 7

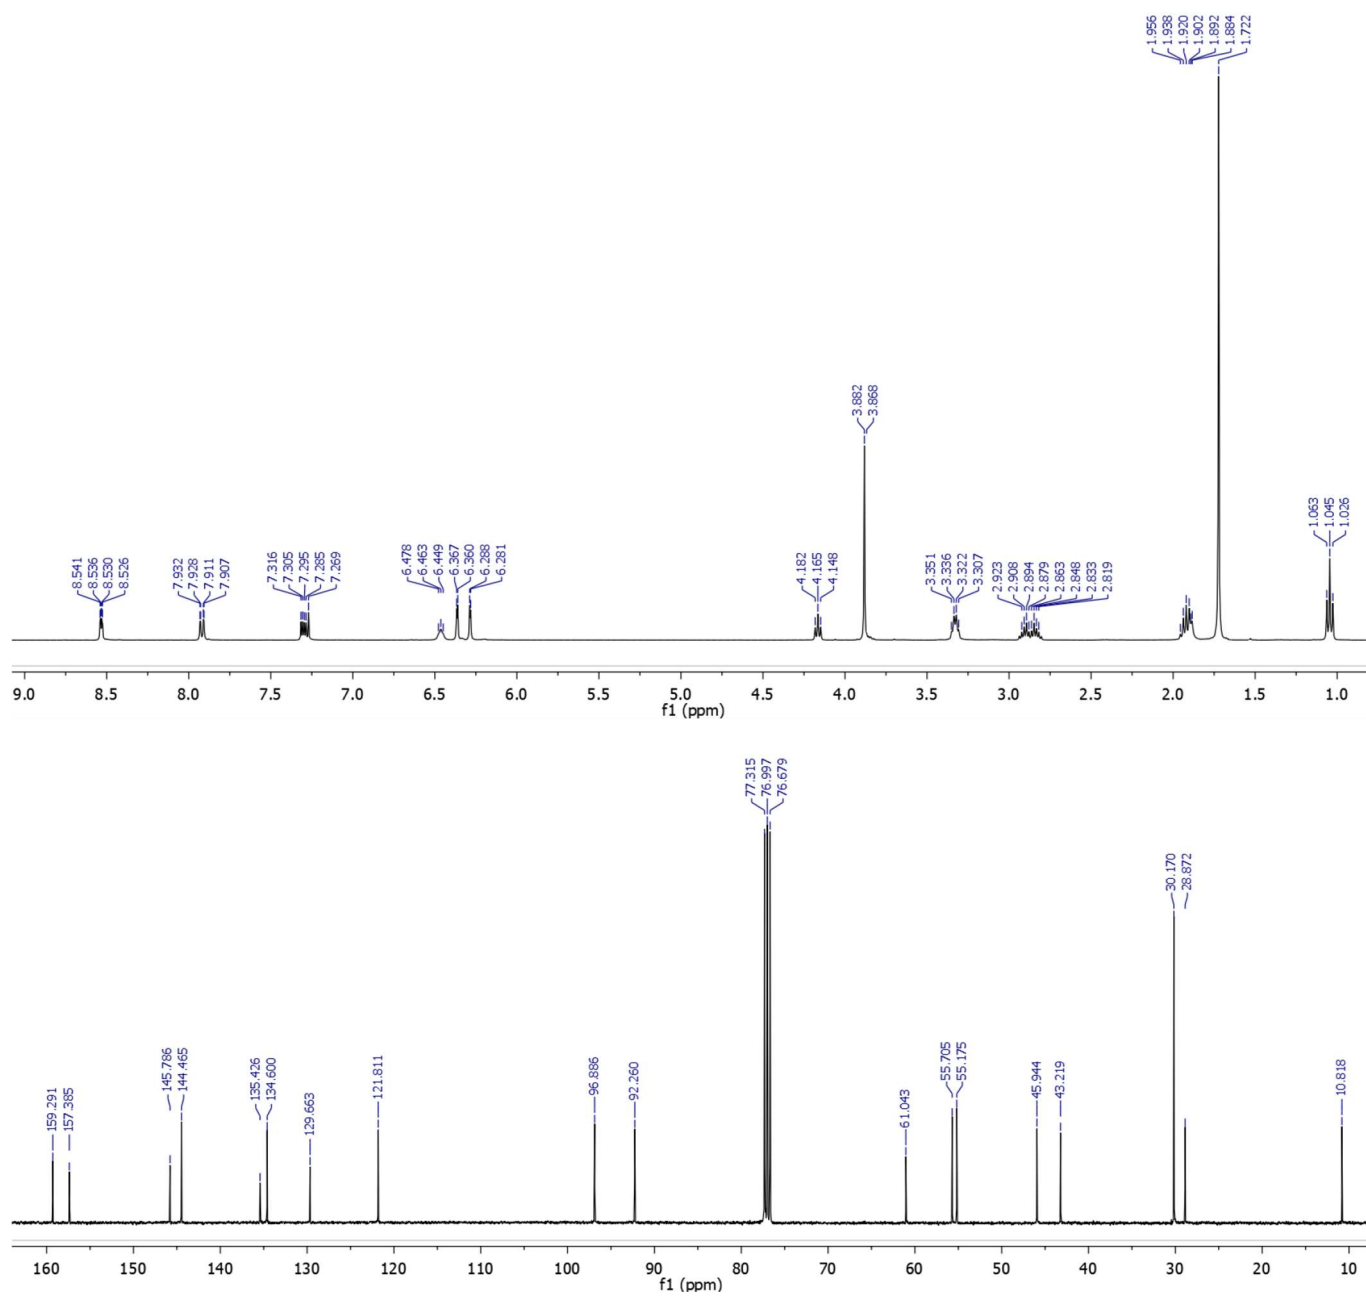

Figure S6.  $^1\text{H}$  NMR at 400 MHz and  $^{13}\text{C}$  NMR at 100 MHz spectra for compound 8

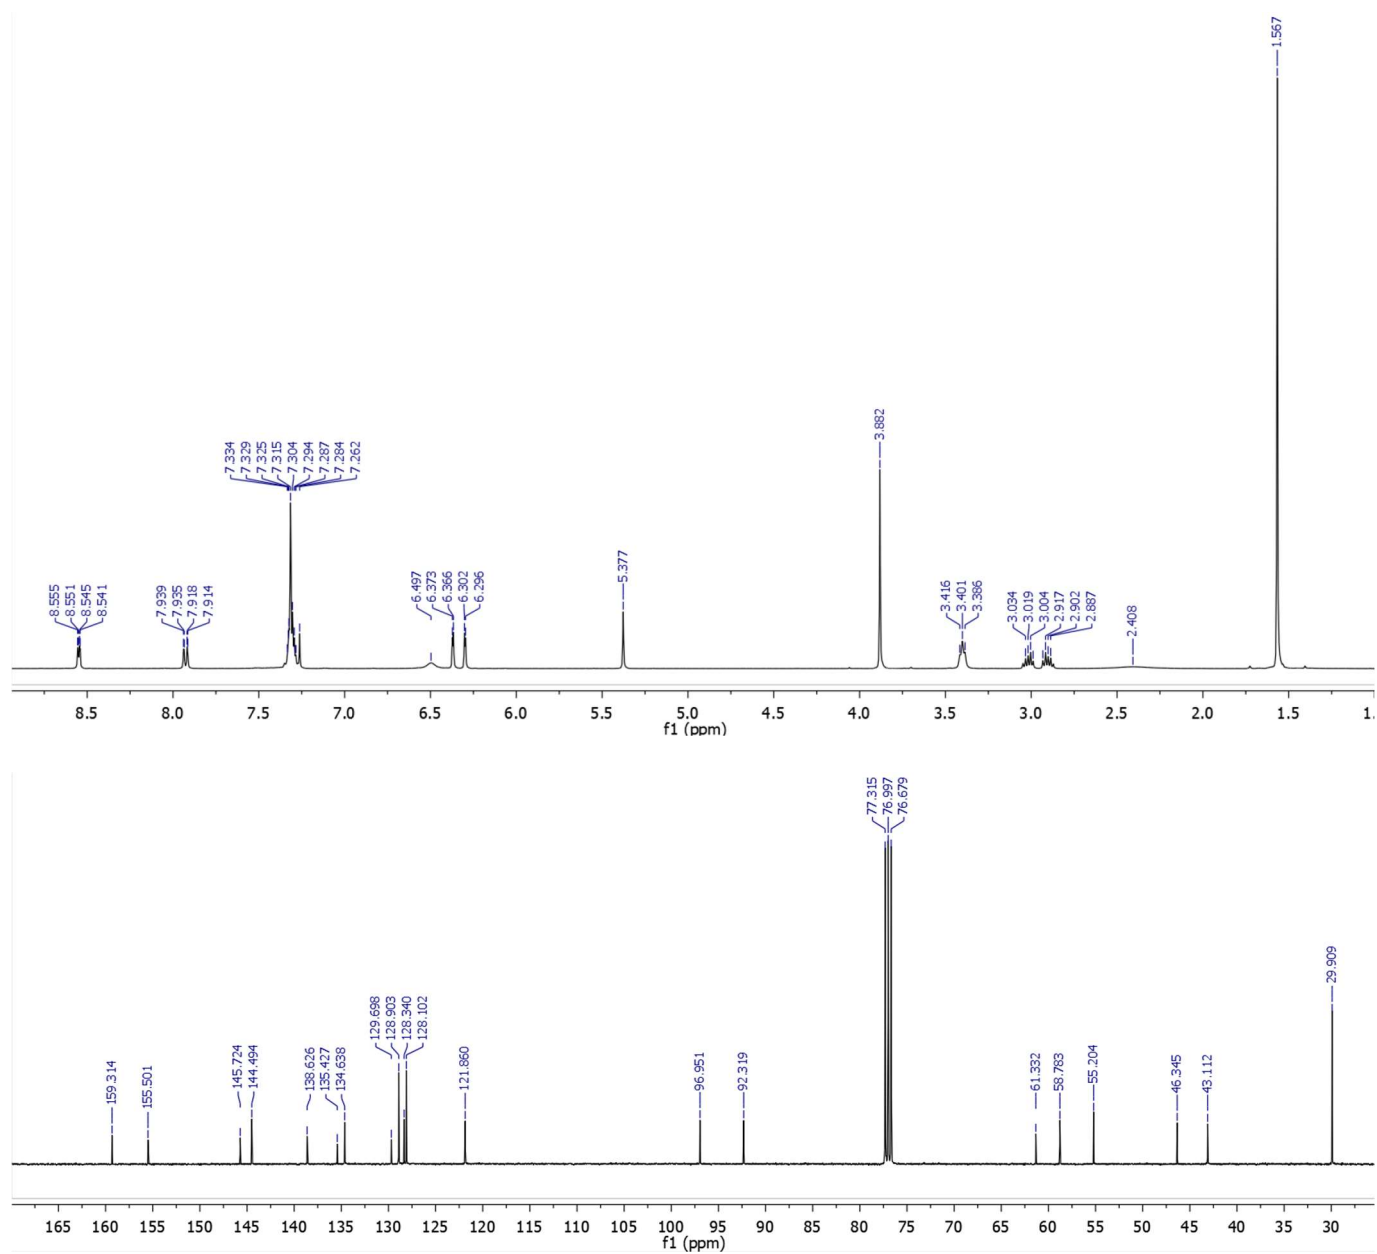

Figure S7. <sup>1</sup>H NMR at 400 MHz and <sup>13</sup>C NMR at 100 MHz spectra for compound 9

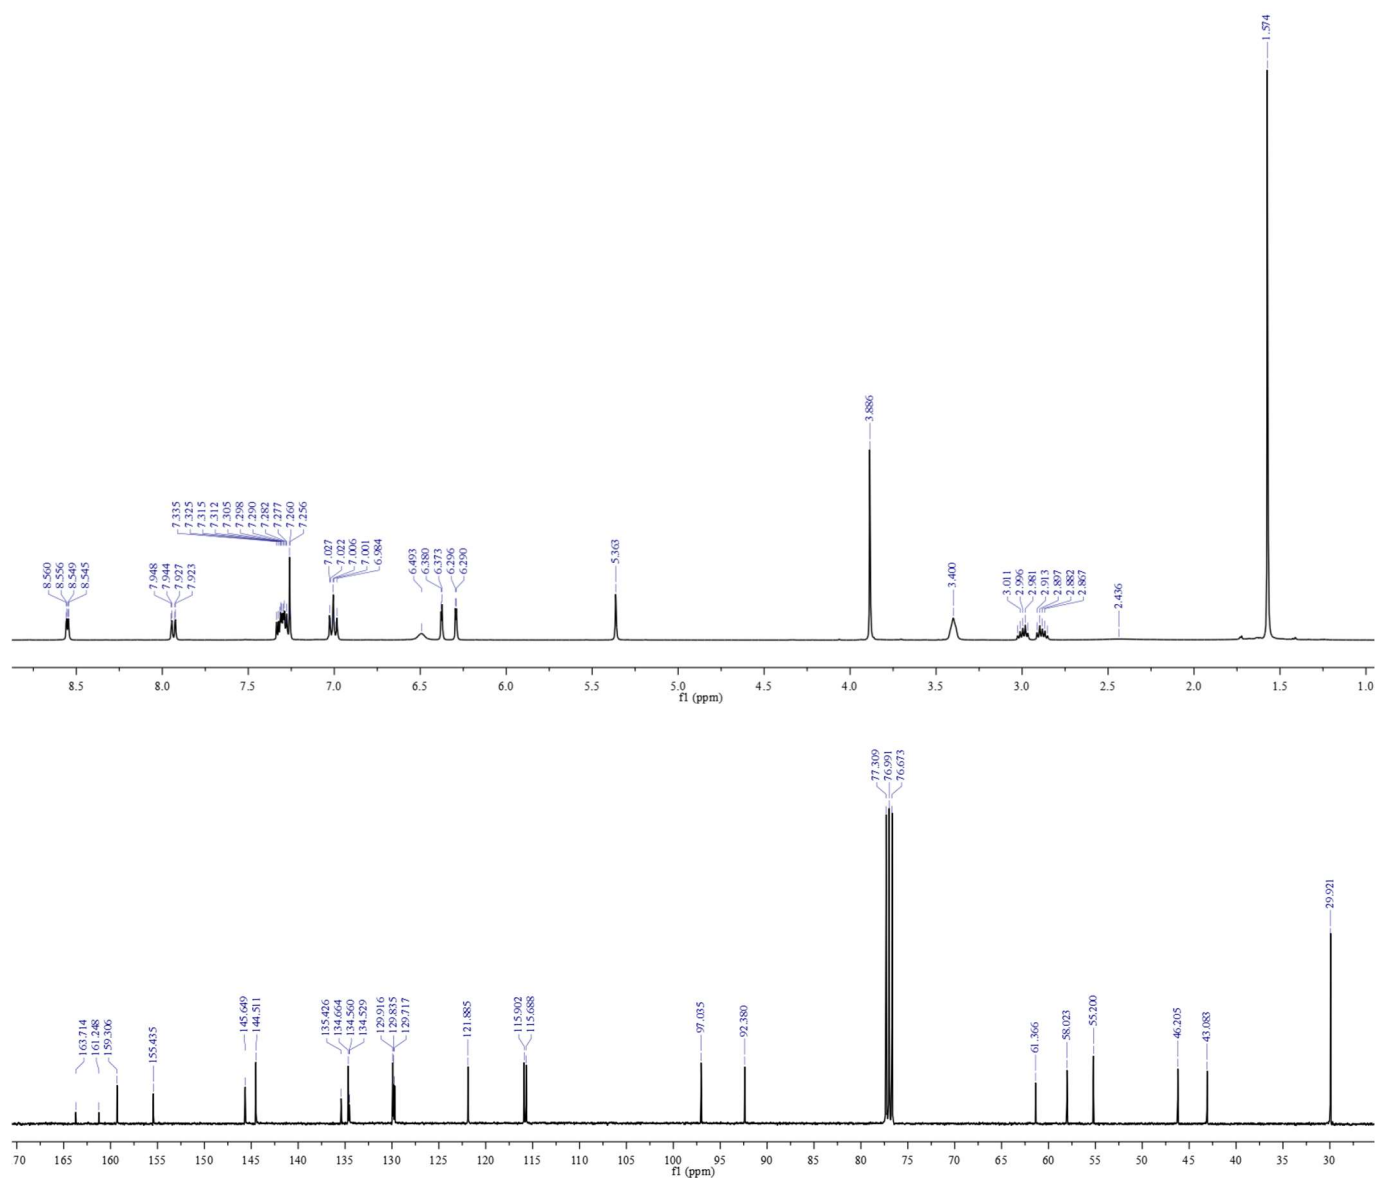

**Figure S8.**  $^1\text{H}$  NMR at 400 MHz and  $^{13}\text{C}$  NMR at 100 MHz spectra for compound **10**

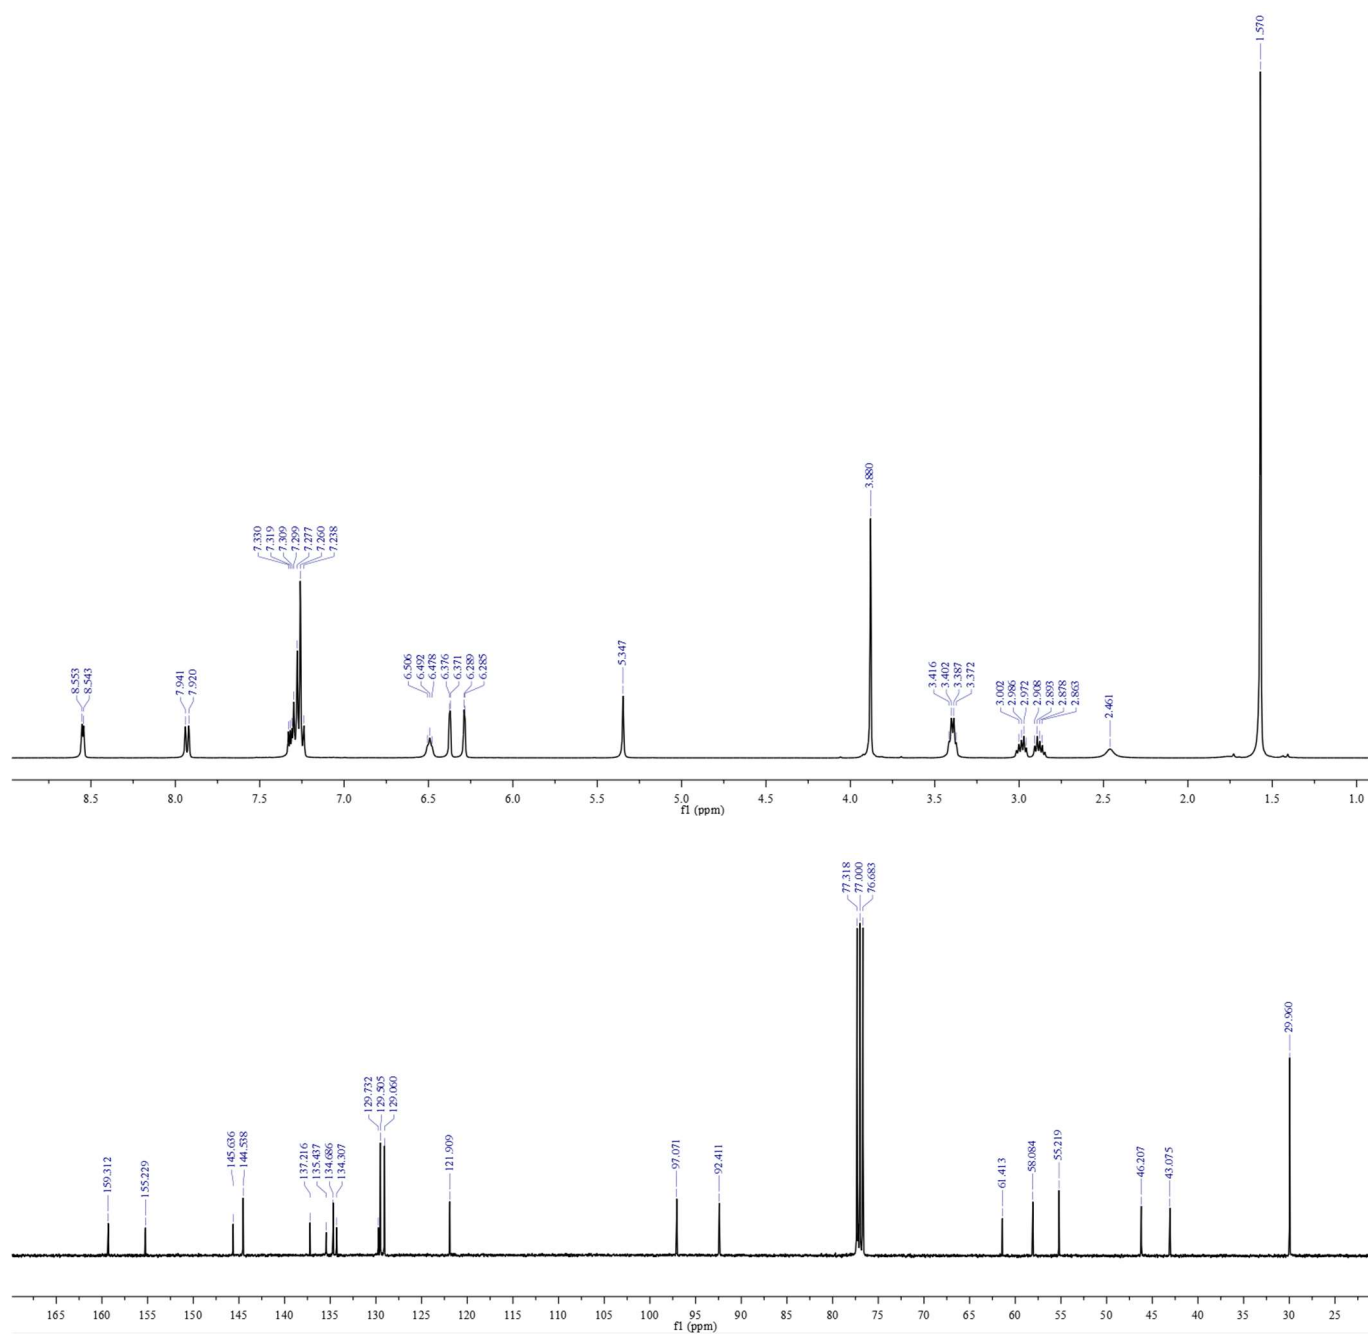

Figure S9. <sup>1</sup>H NMR at 400 MHz and <sup>13</sup>C NMR at 100 MHz spectra for compound 11

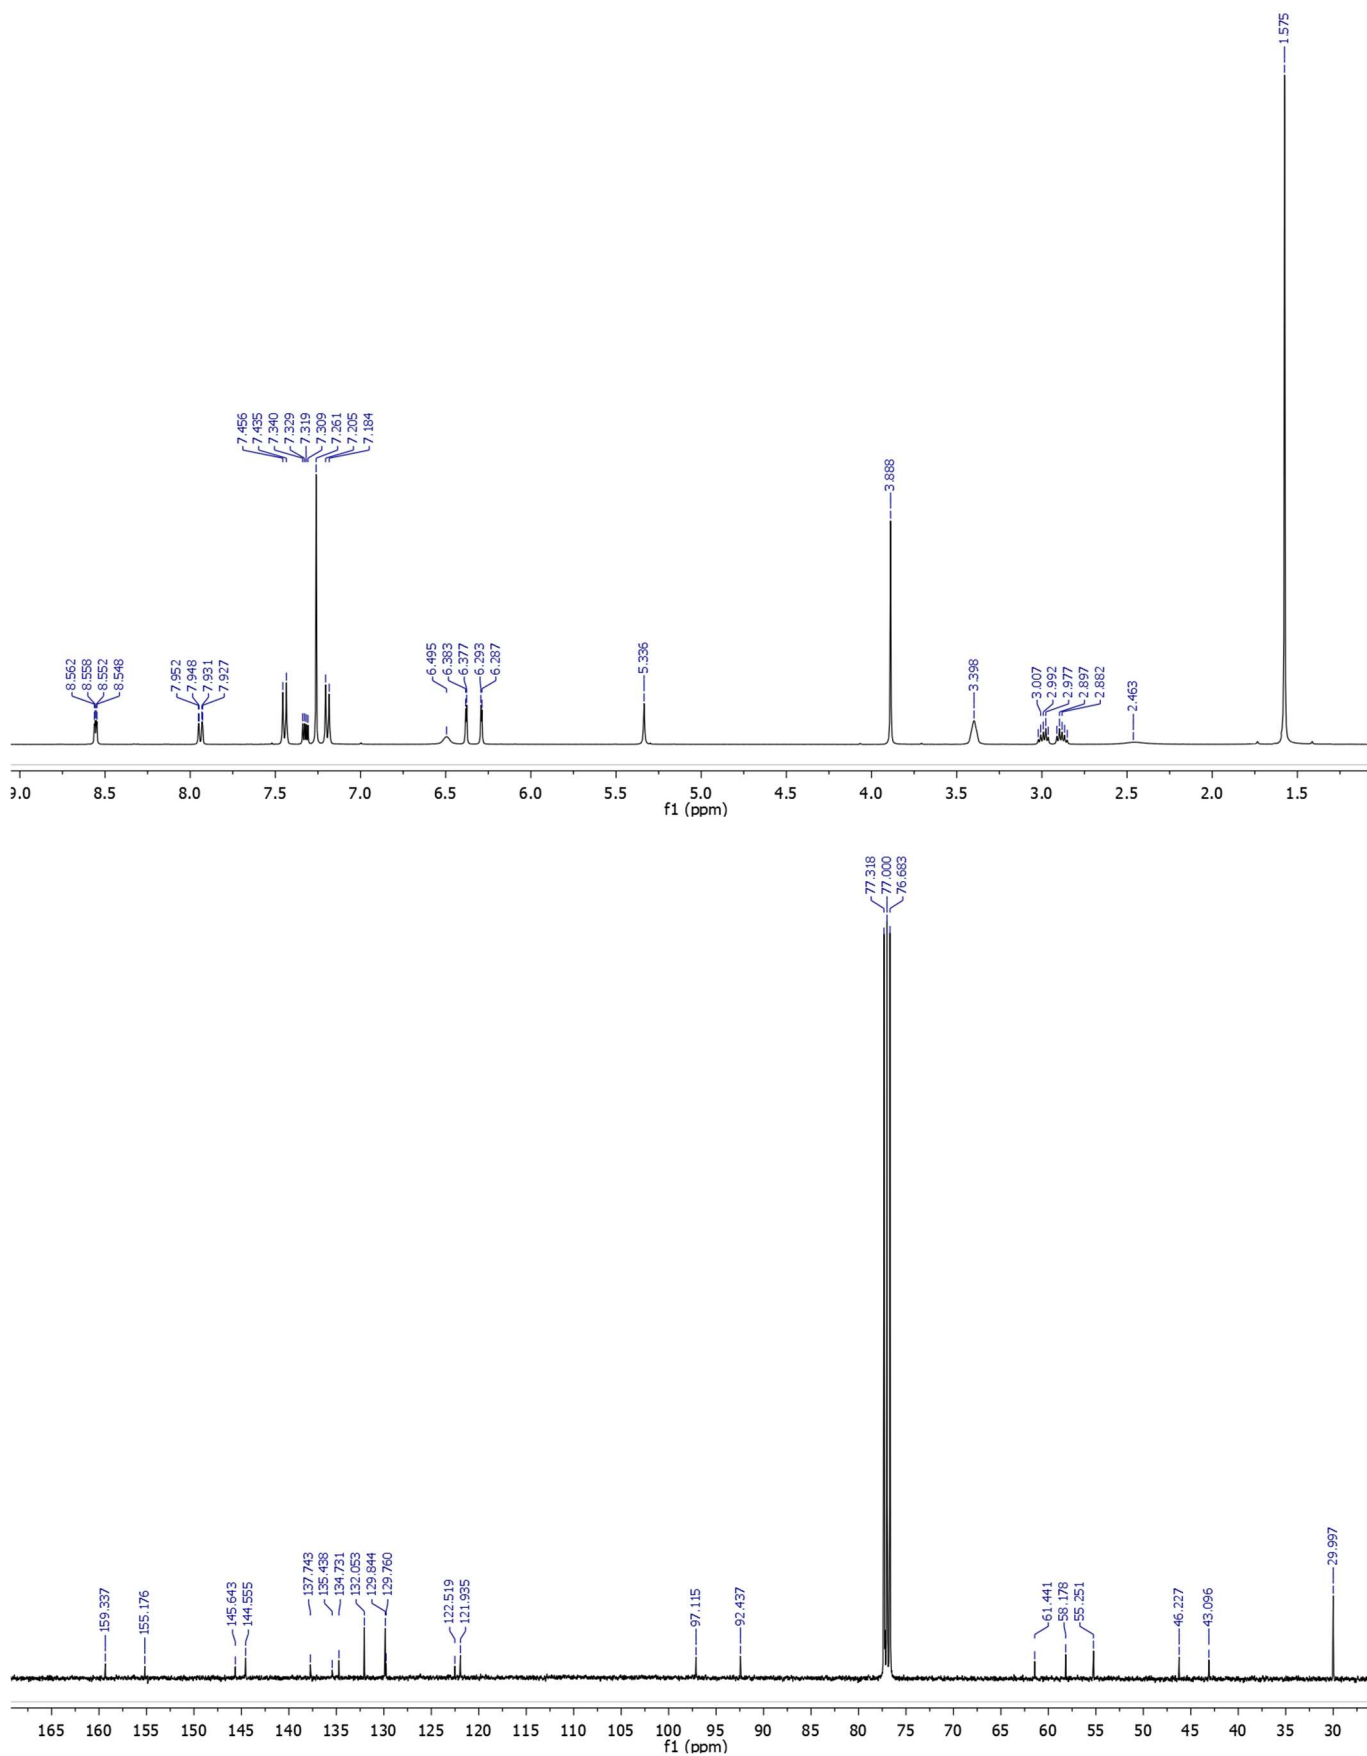

Figure S10. <sup>1</sup>H NMR at 400 MHz and <sup>13</sup>C NMR at 100 MHz spectra for compound 12

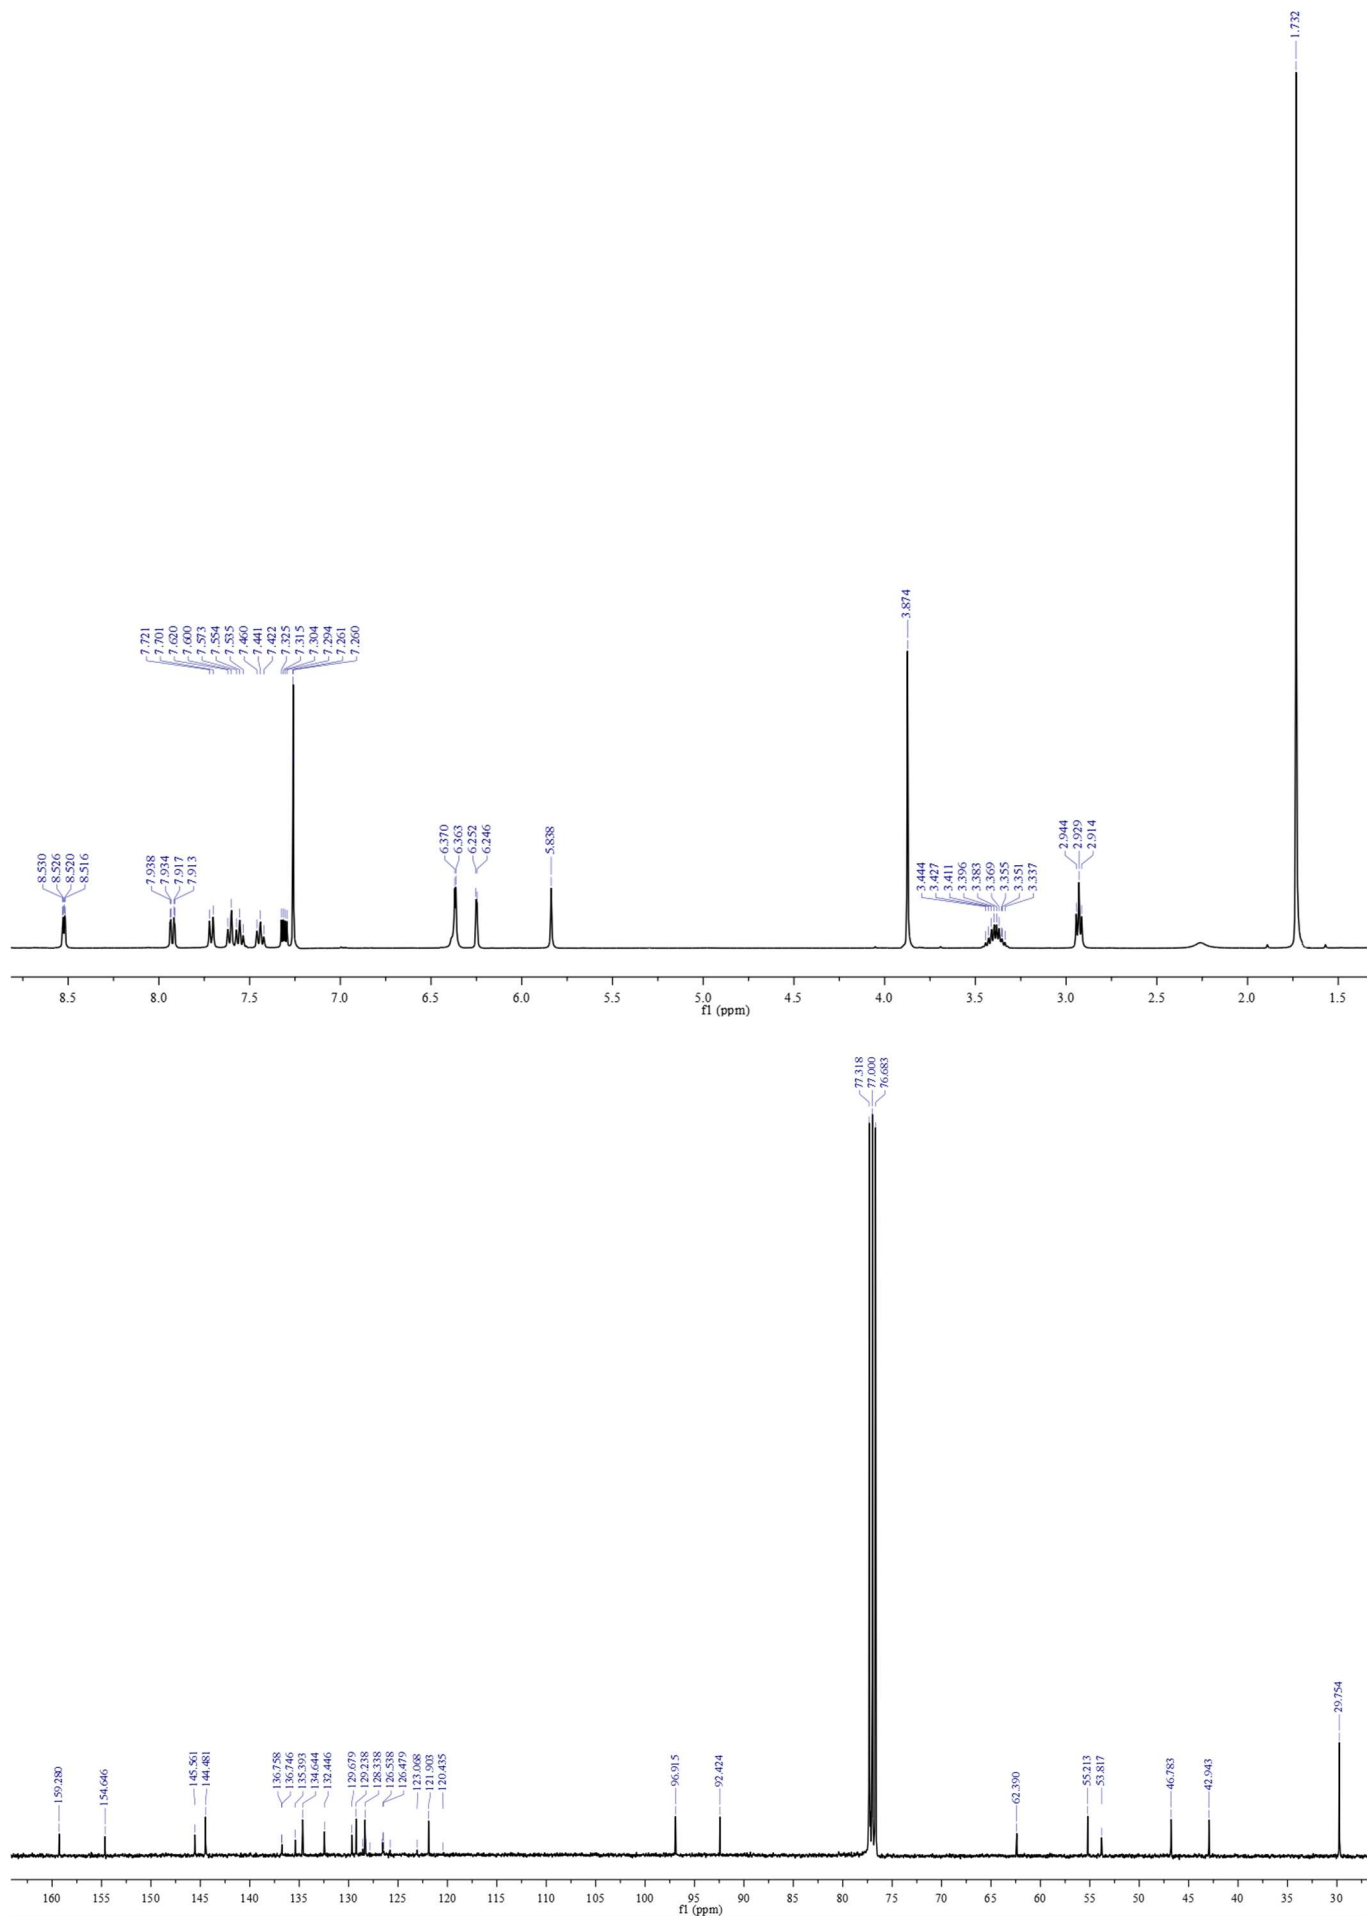

Figure S11. <sup>1</sup>H NMR at 400 MHz and <sup>13</sup>C NMR at 100 MHz spectra for compound 13

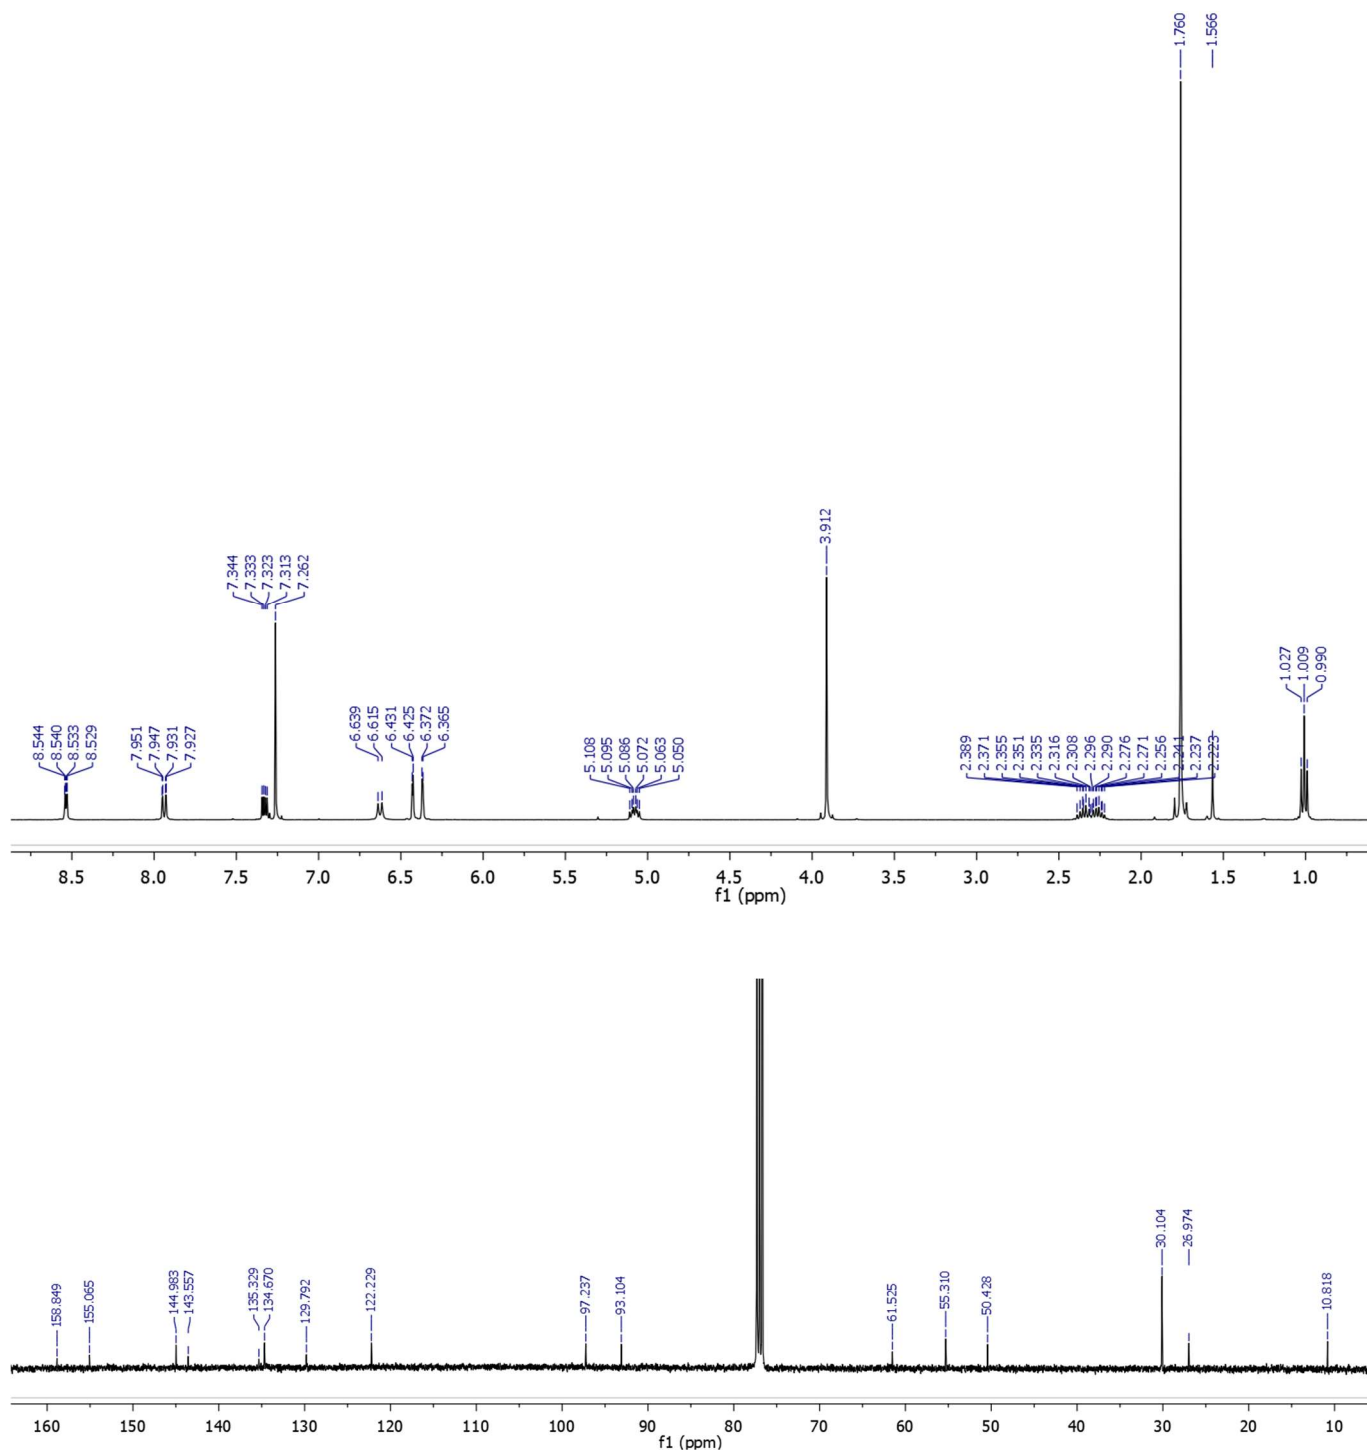

Figure S12. <sup>1</sup>H NMR at 400 MHz and <sup>13</sup>C NMR at 100 MHz spectra for compound **14**

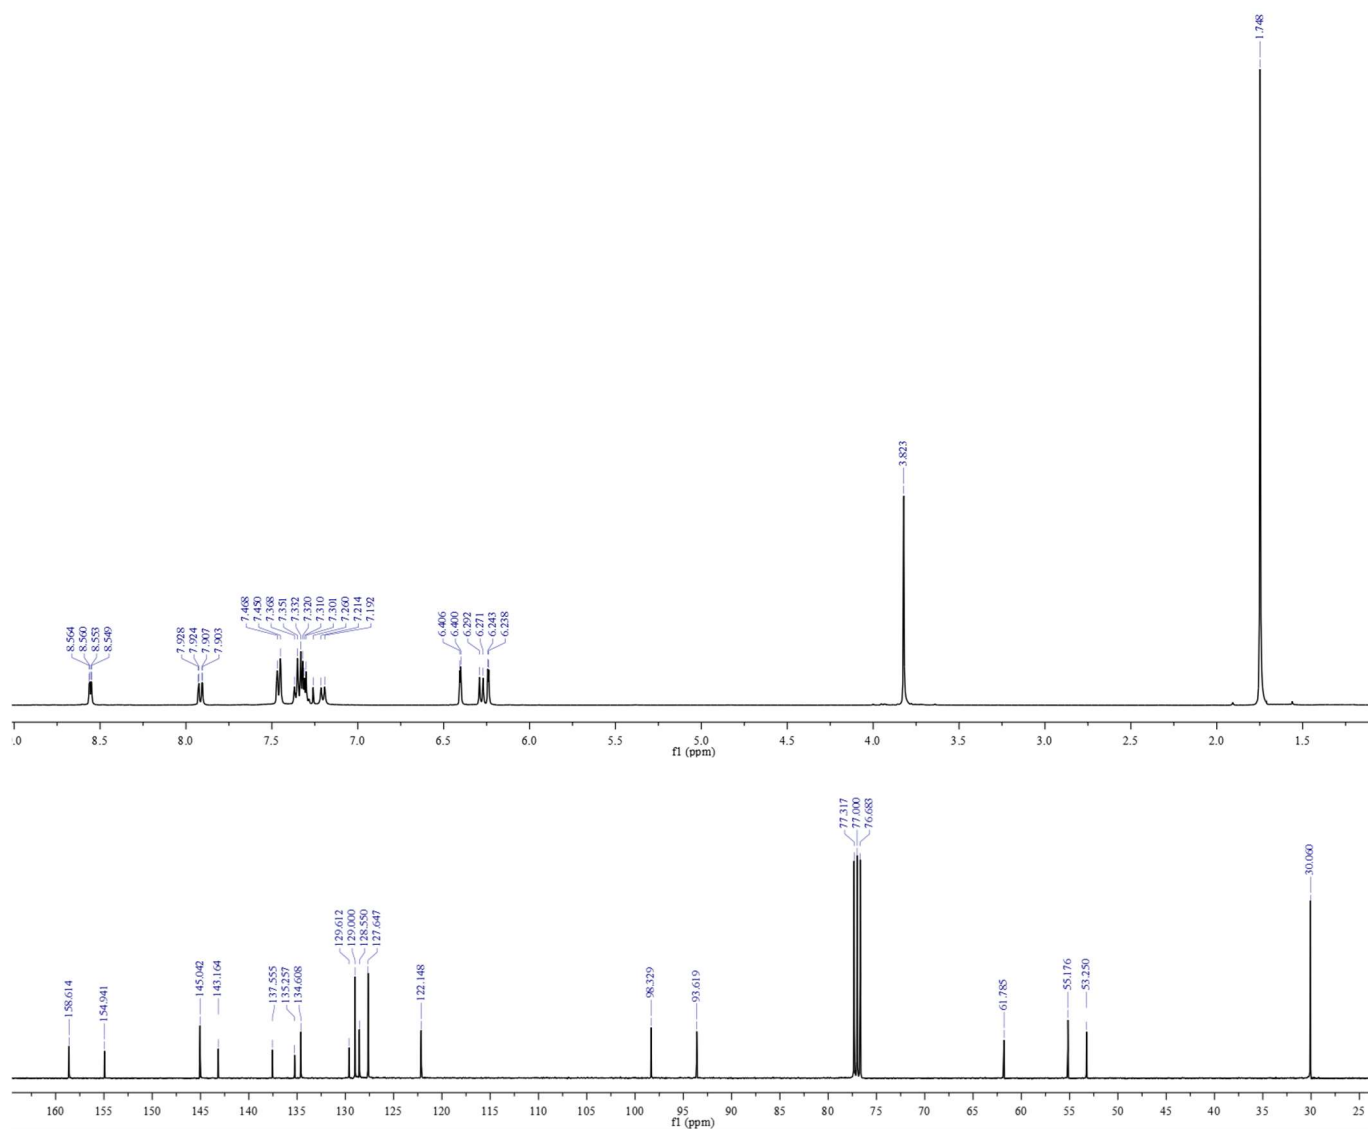

Figure S13. <sup>1</sup>H NMR at 400 MHz and <sup>13</sup>C NMR at 100 MHz spectra for compound 15

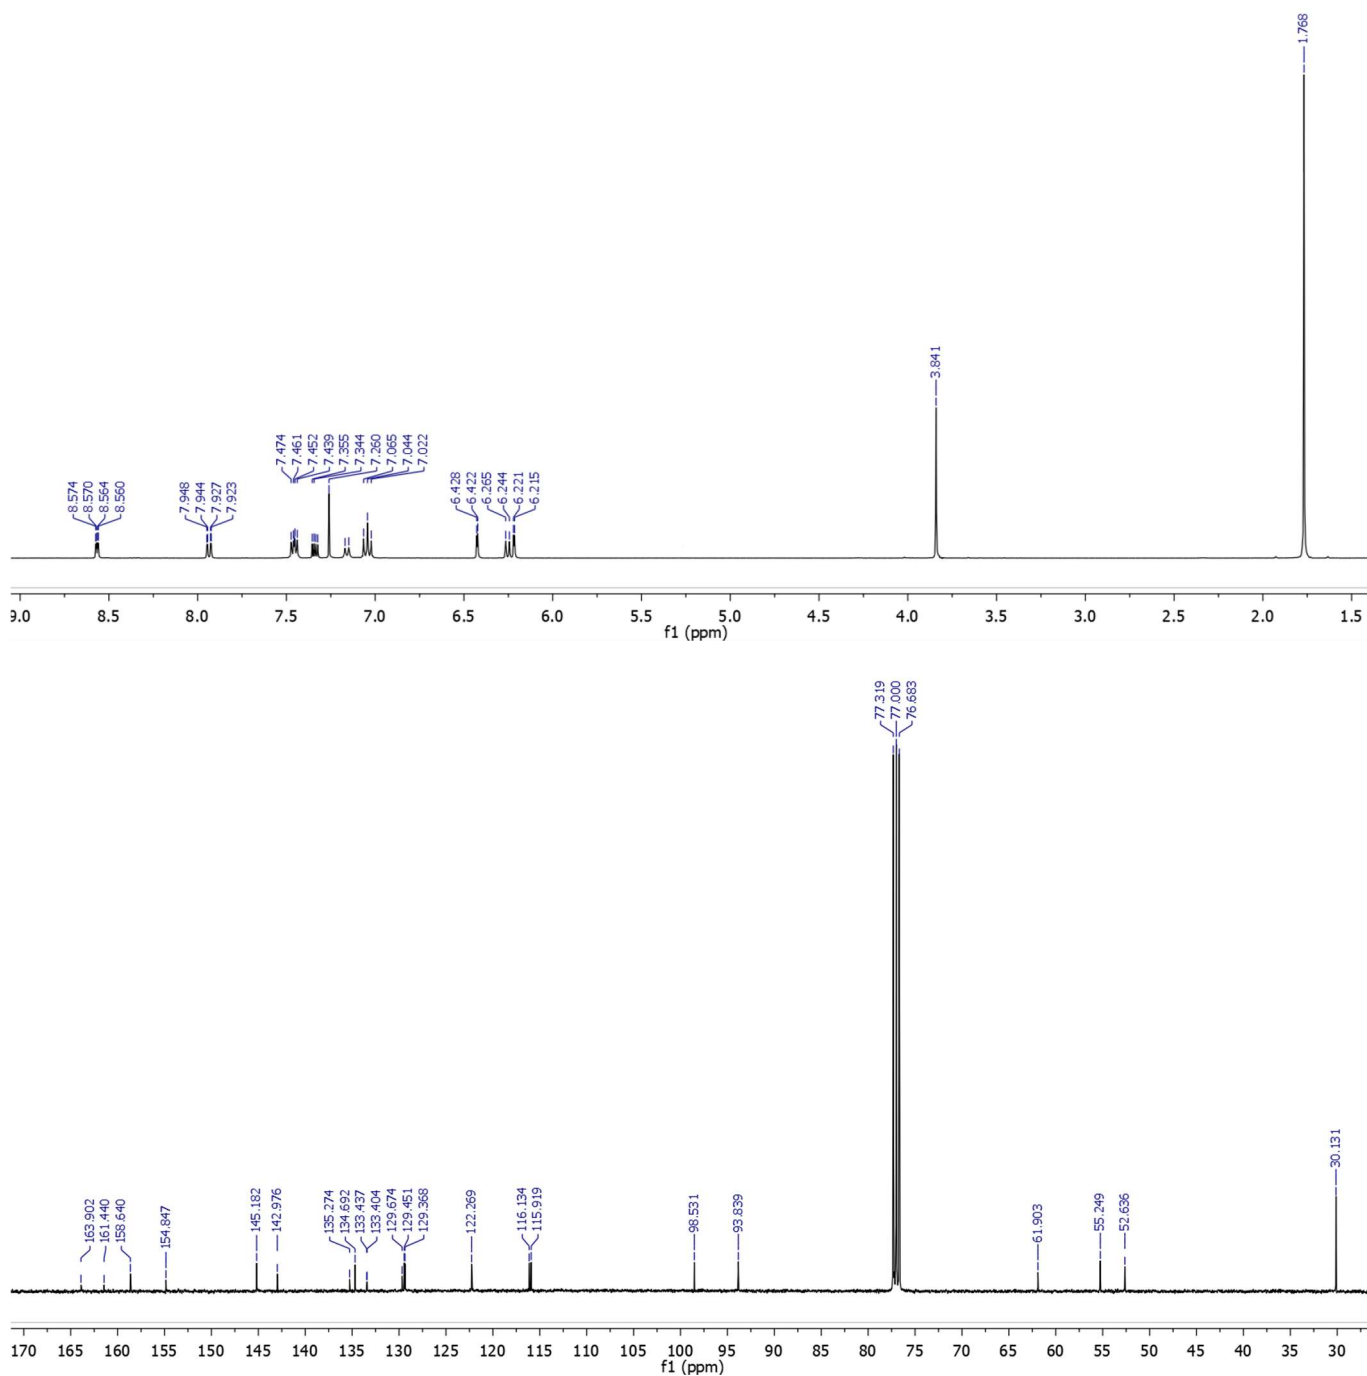

Figure S14. <sup>1</sup>H NMR at 400 MHz and <sup>13</sup>C NMR at 100 MHz spectra for compound **16**

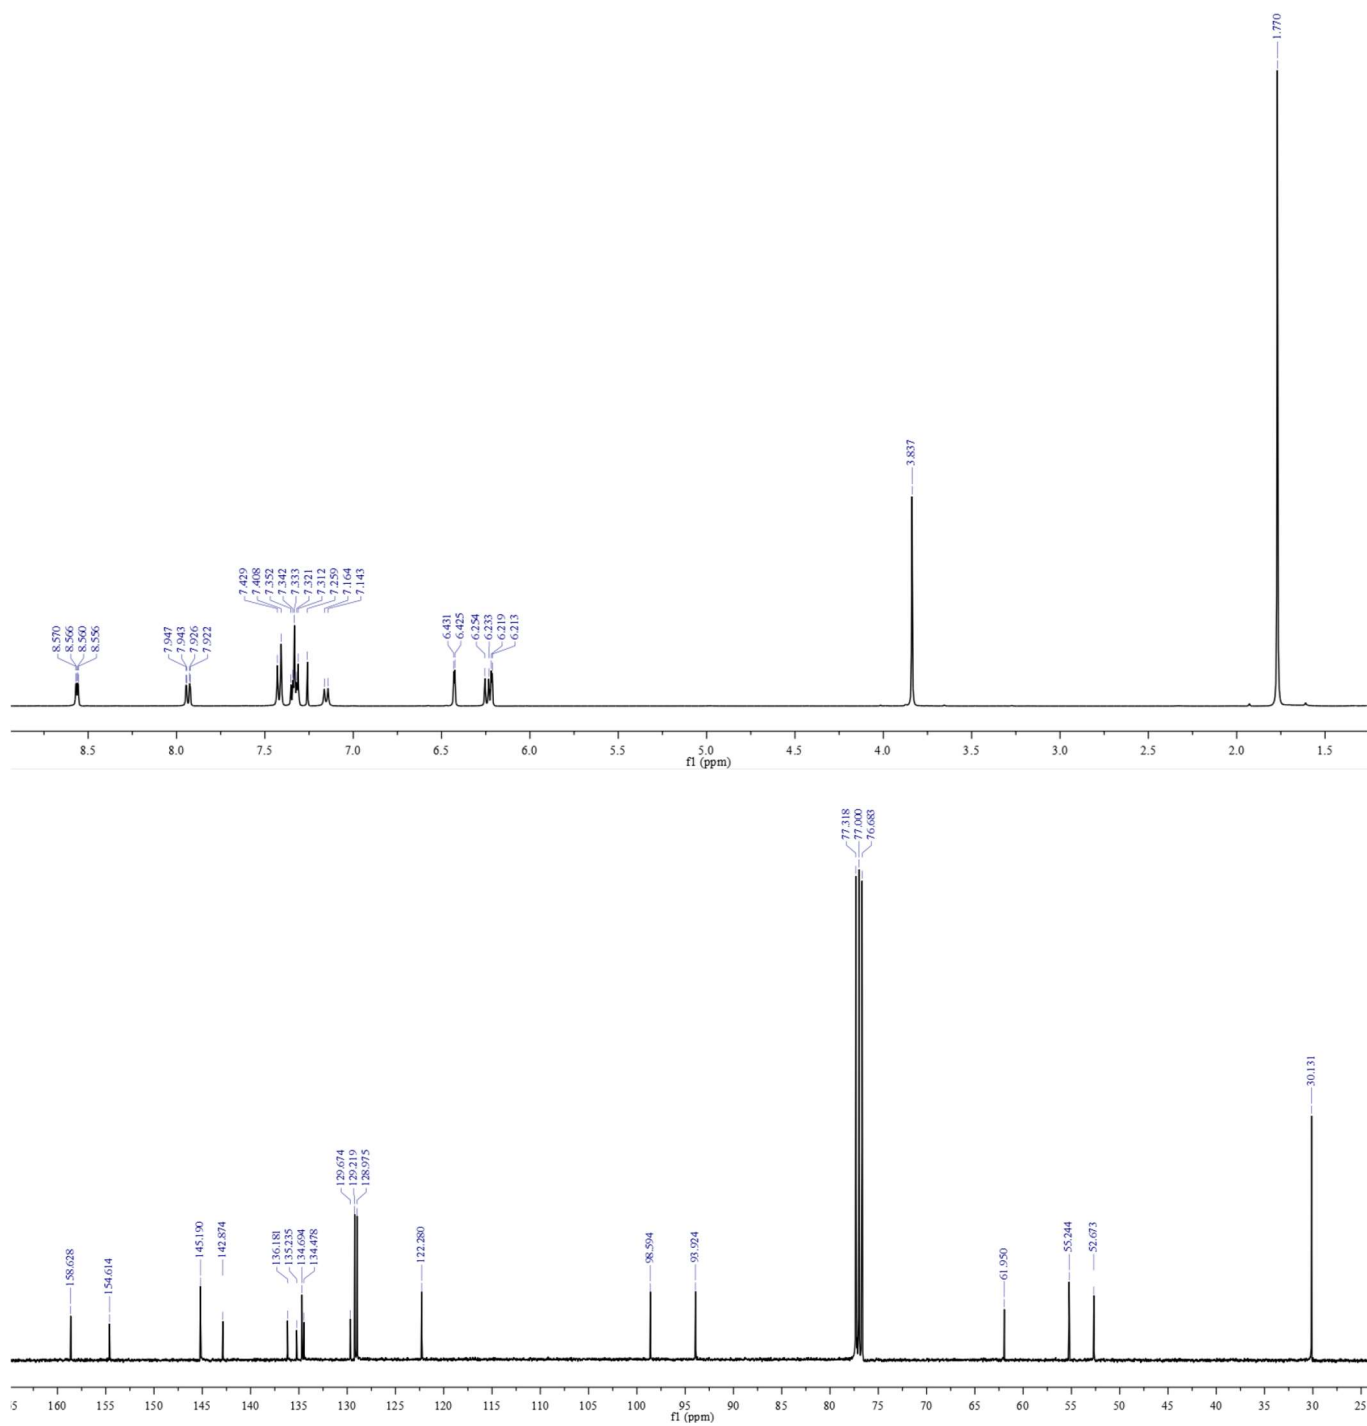

Figure S15. <sup>1</sup>H NMR at 400 MHz and <sup>13</sup>C NMR at 100 MHz spectra for compound 17

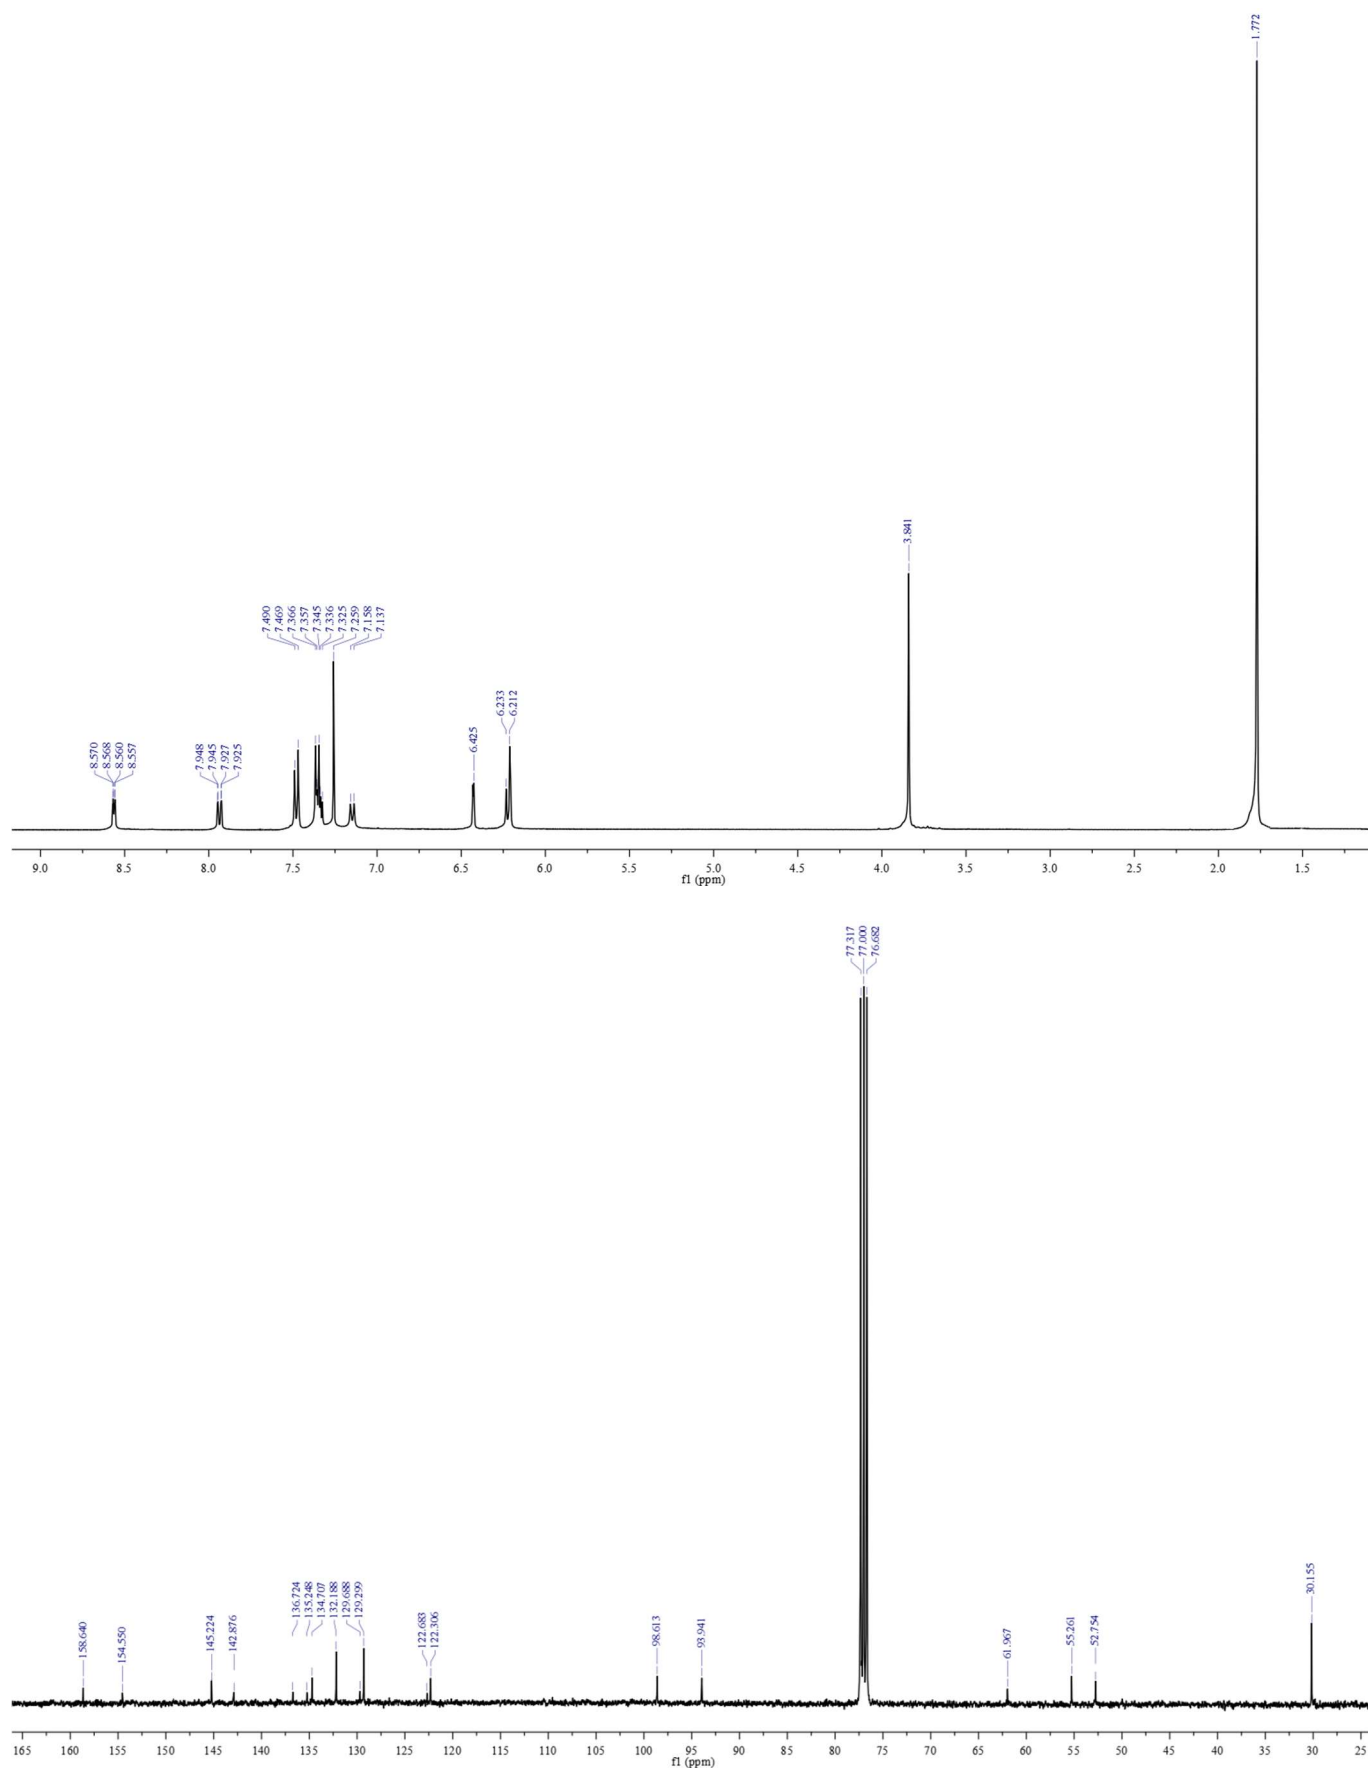

**Figure S16.**  $^1\text{H}$  NMR at 400 MHz and  $^{13}\text{C}$  NMR at 100 MHz spectra for compound **18**

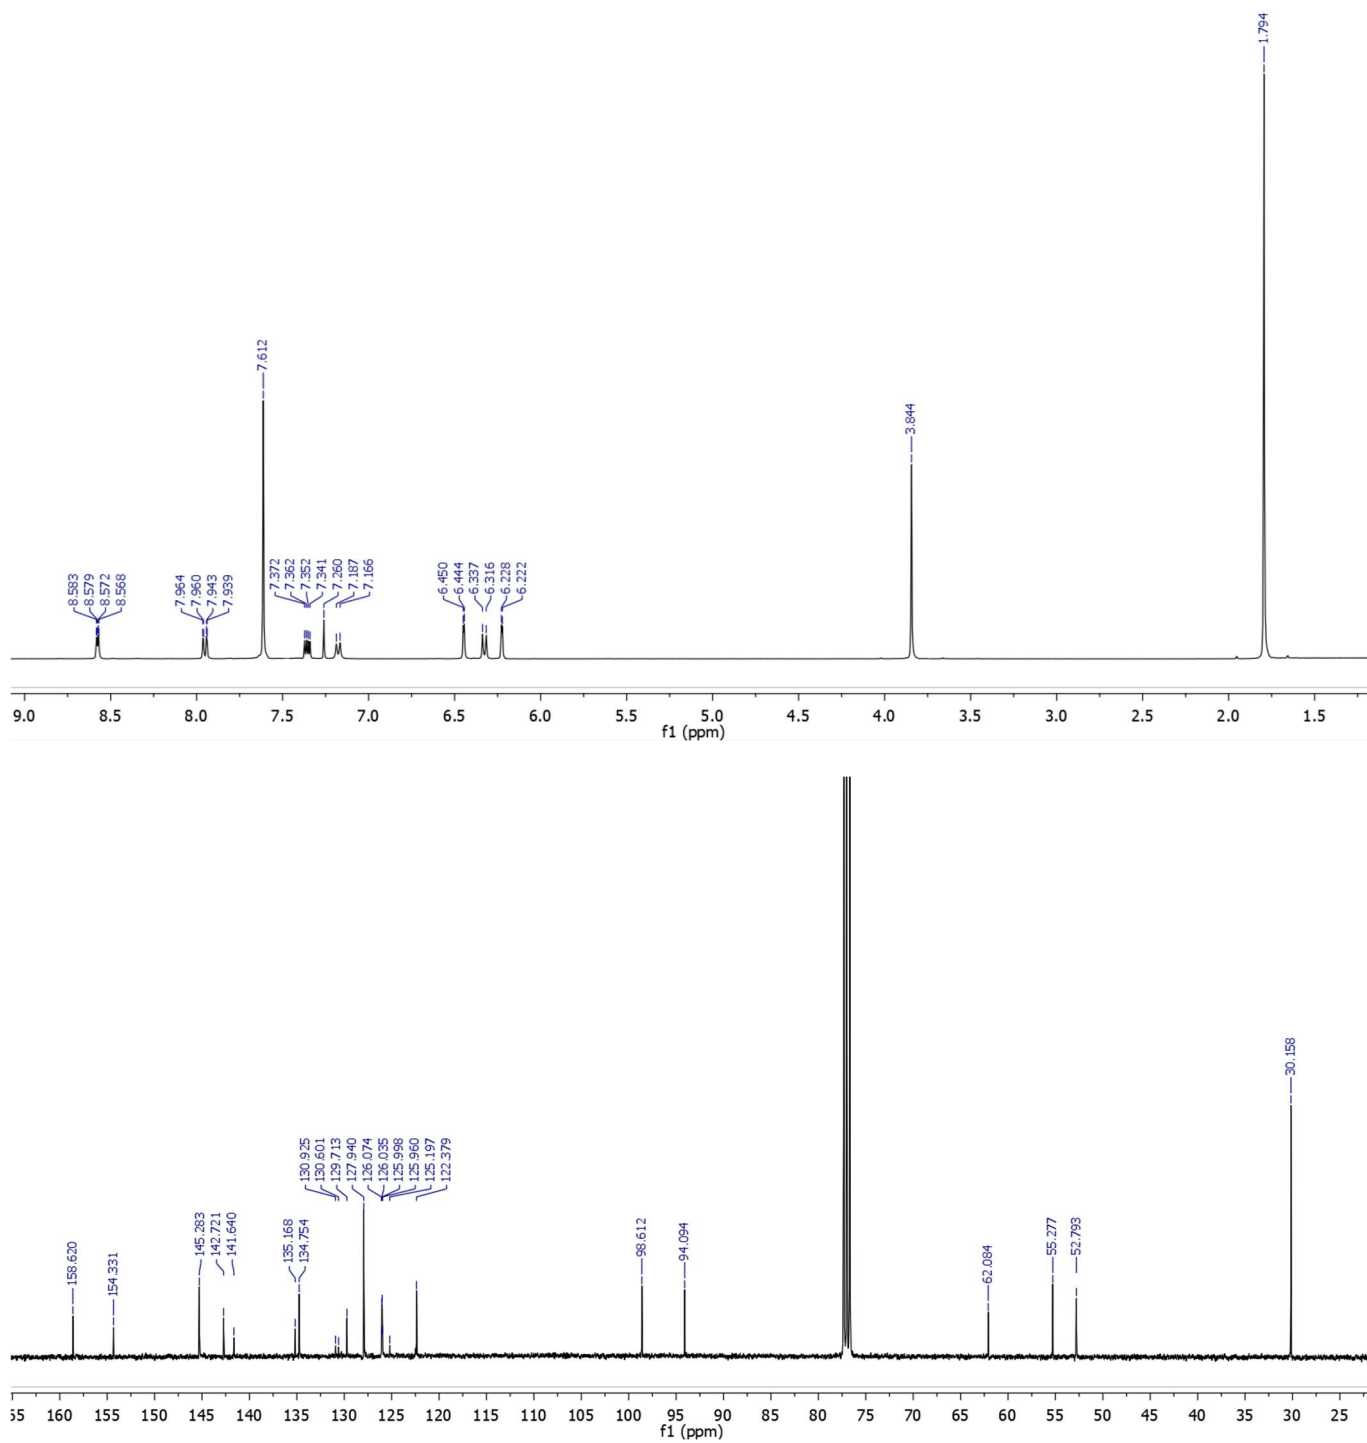

Figure S17. <sup>1</sup>H NMR at 400 MHz and <sup>13</sup>C NMR at 100 MHz spectra for compound **19**

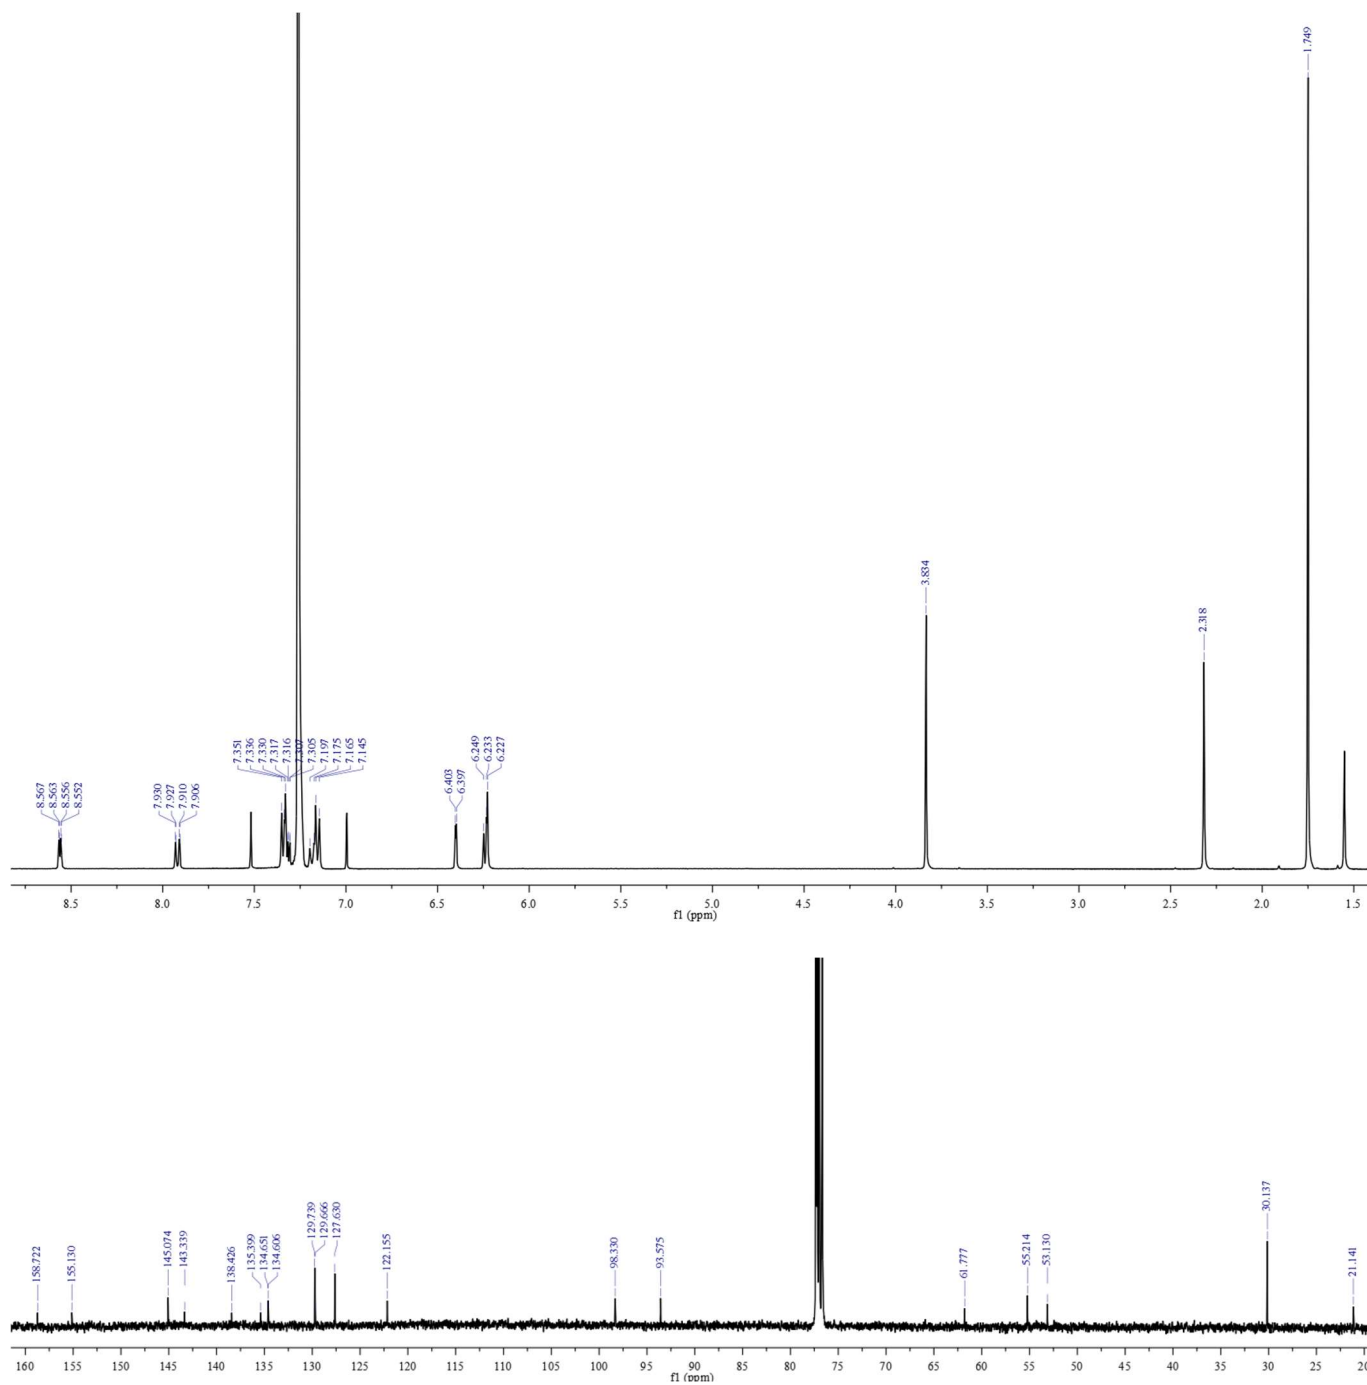

Figure S18. <sup>1</sup>H NMR at 400 MHz and <sup>13</sup>C NMR at 100 MHz spectra for compound 20

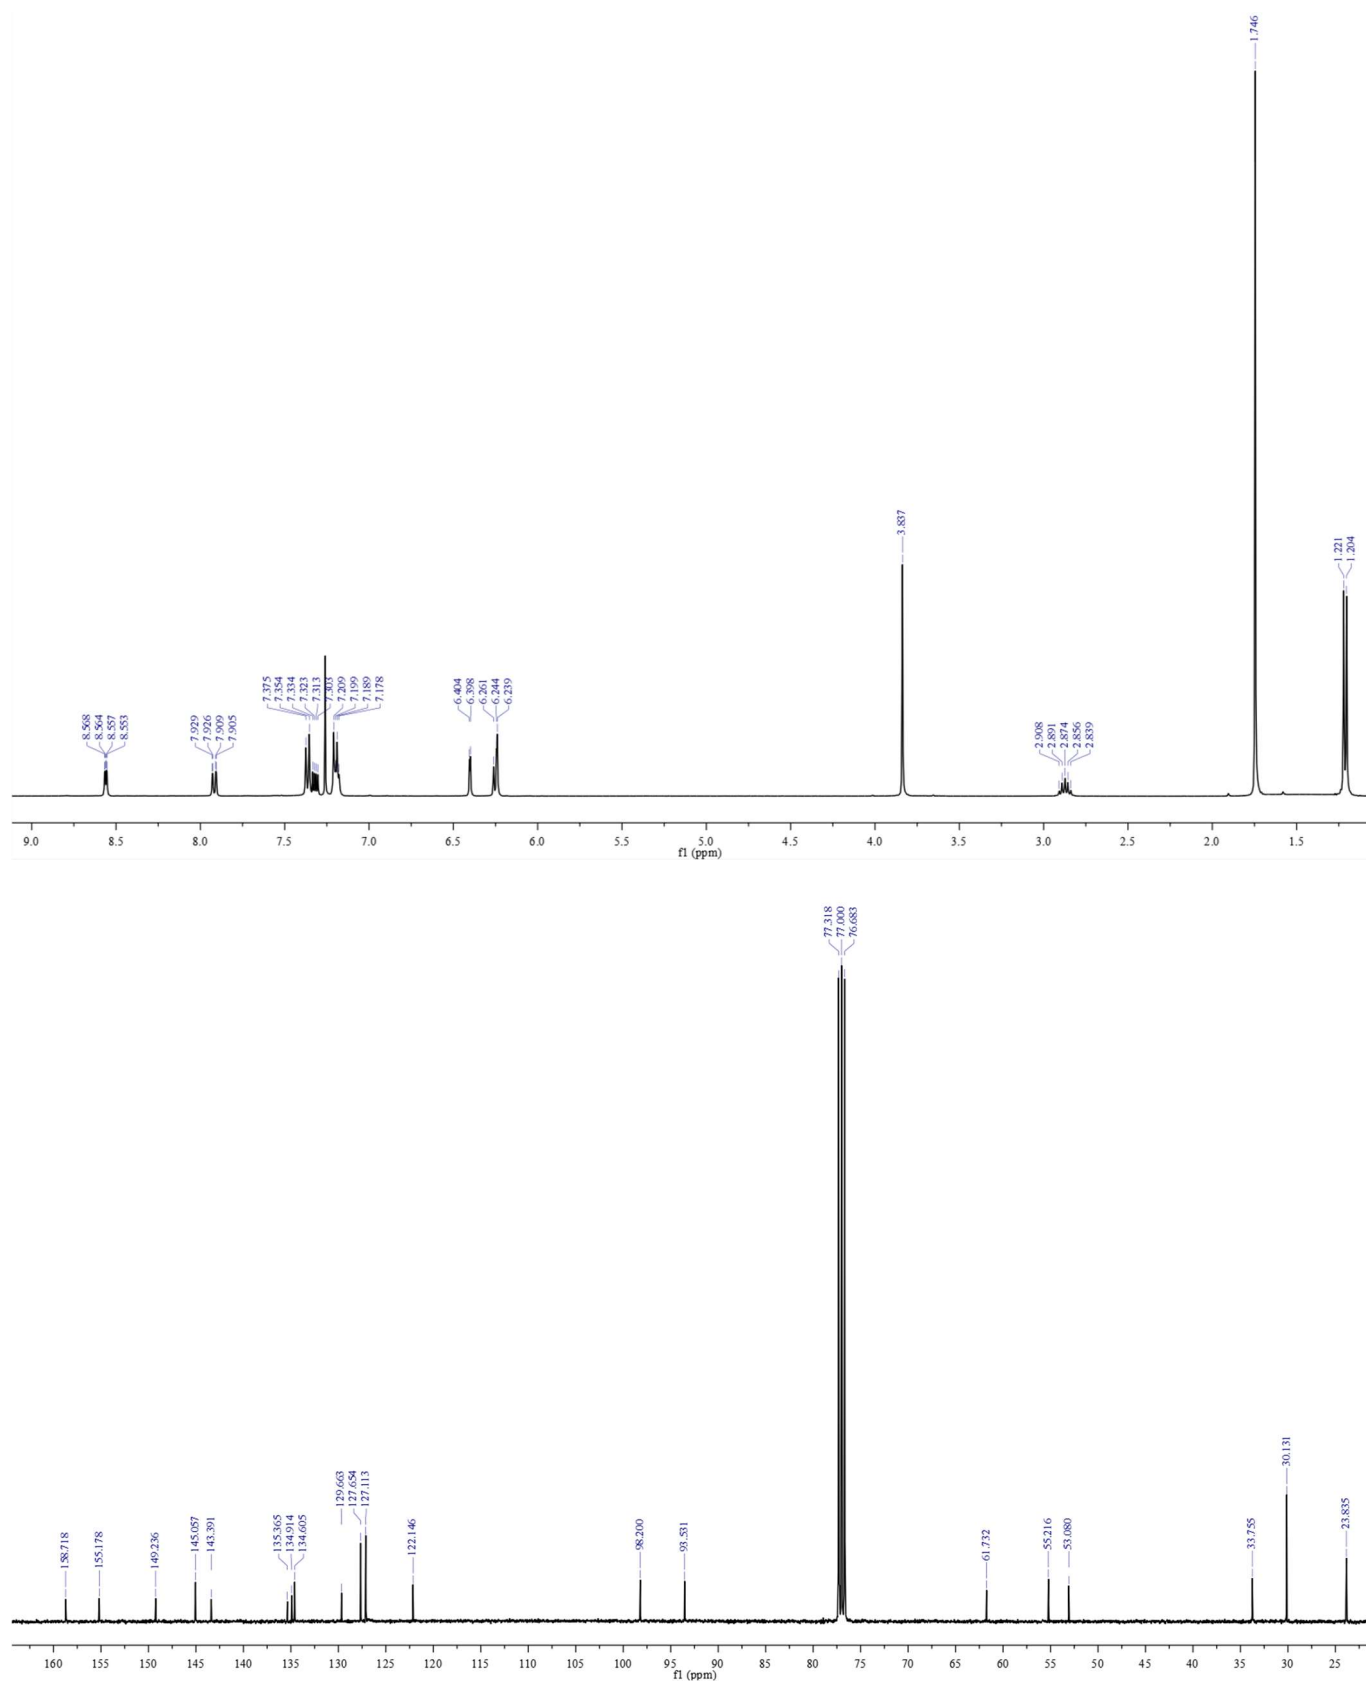

**Figure S19.**  $^1\text{H}$  NMR at 400 MHz and  $^{13}\text{C}$  NMR at 100 MHz spectra for compound **21**

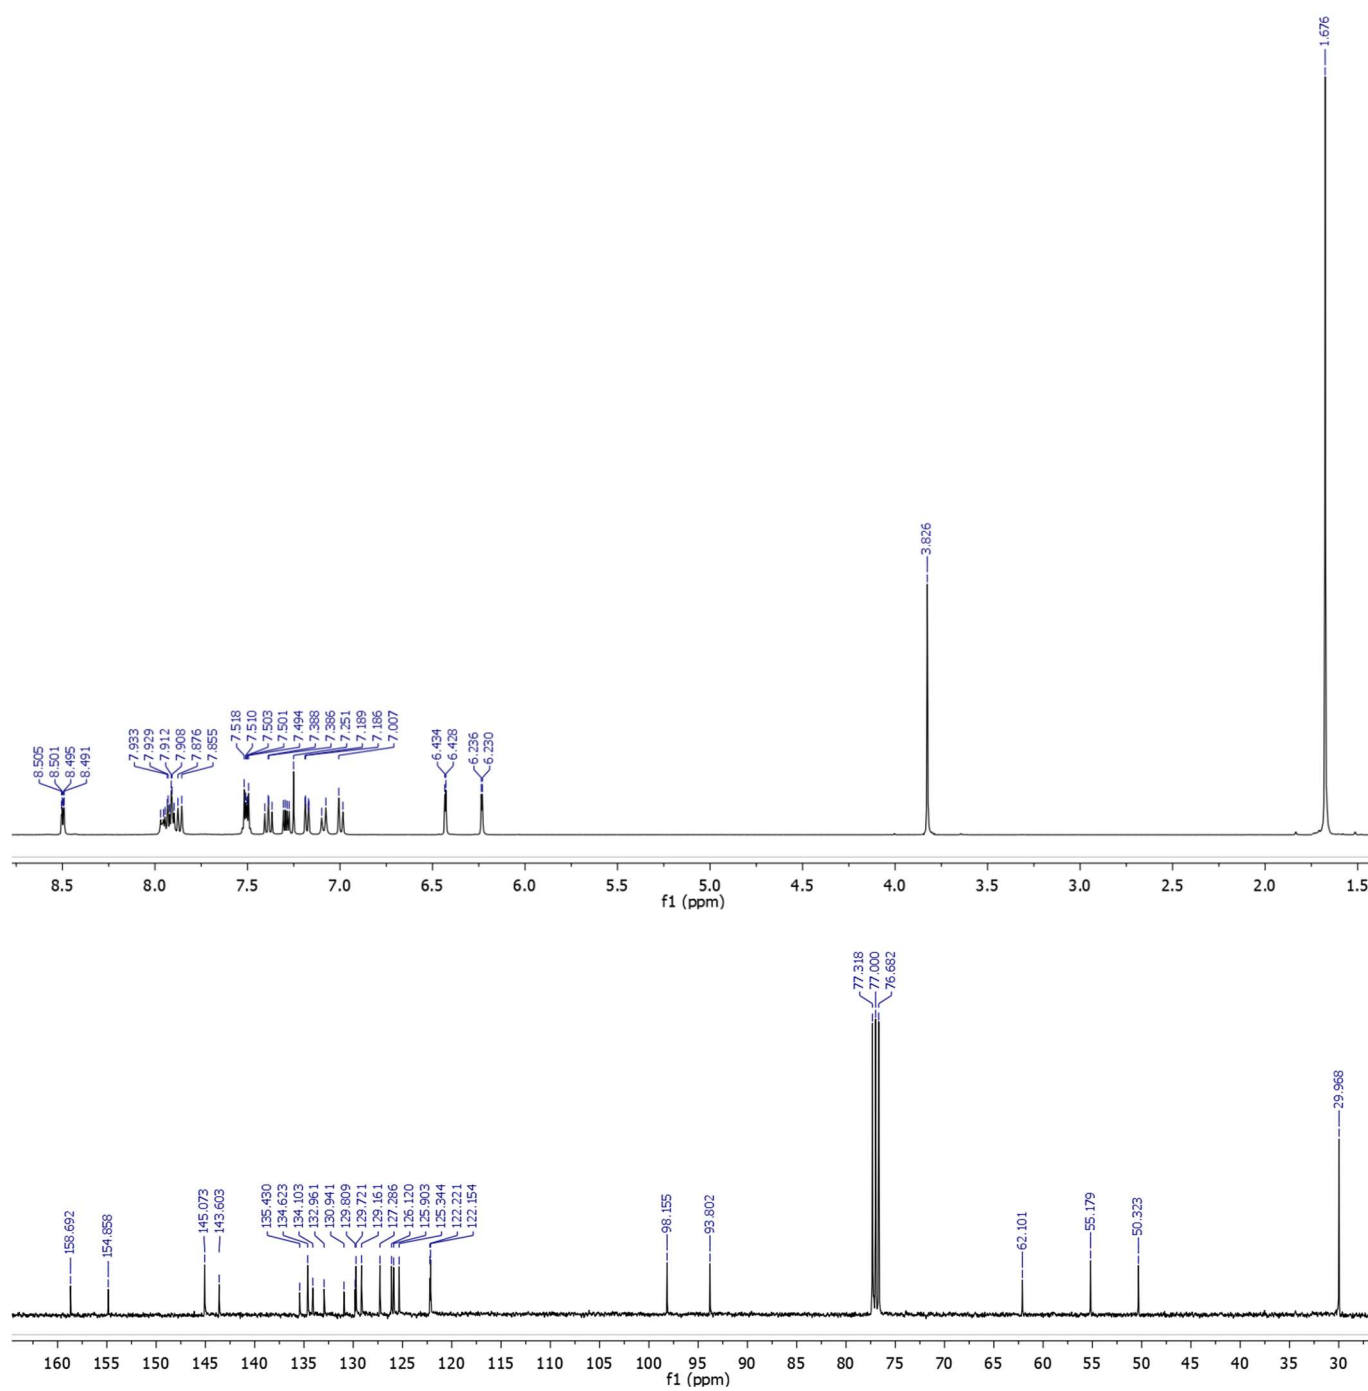

Figure S20. <sup>1</sup>H NMR at 400 MHz and <sup>13</sup>C NMR at 100 MHz spectra for compound 22

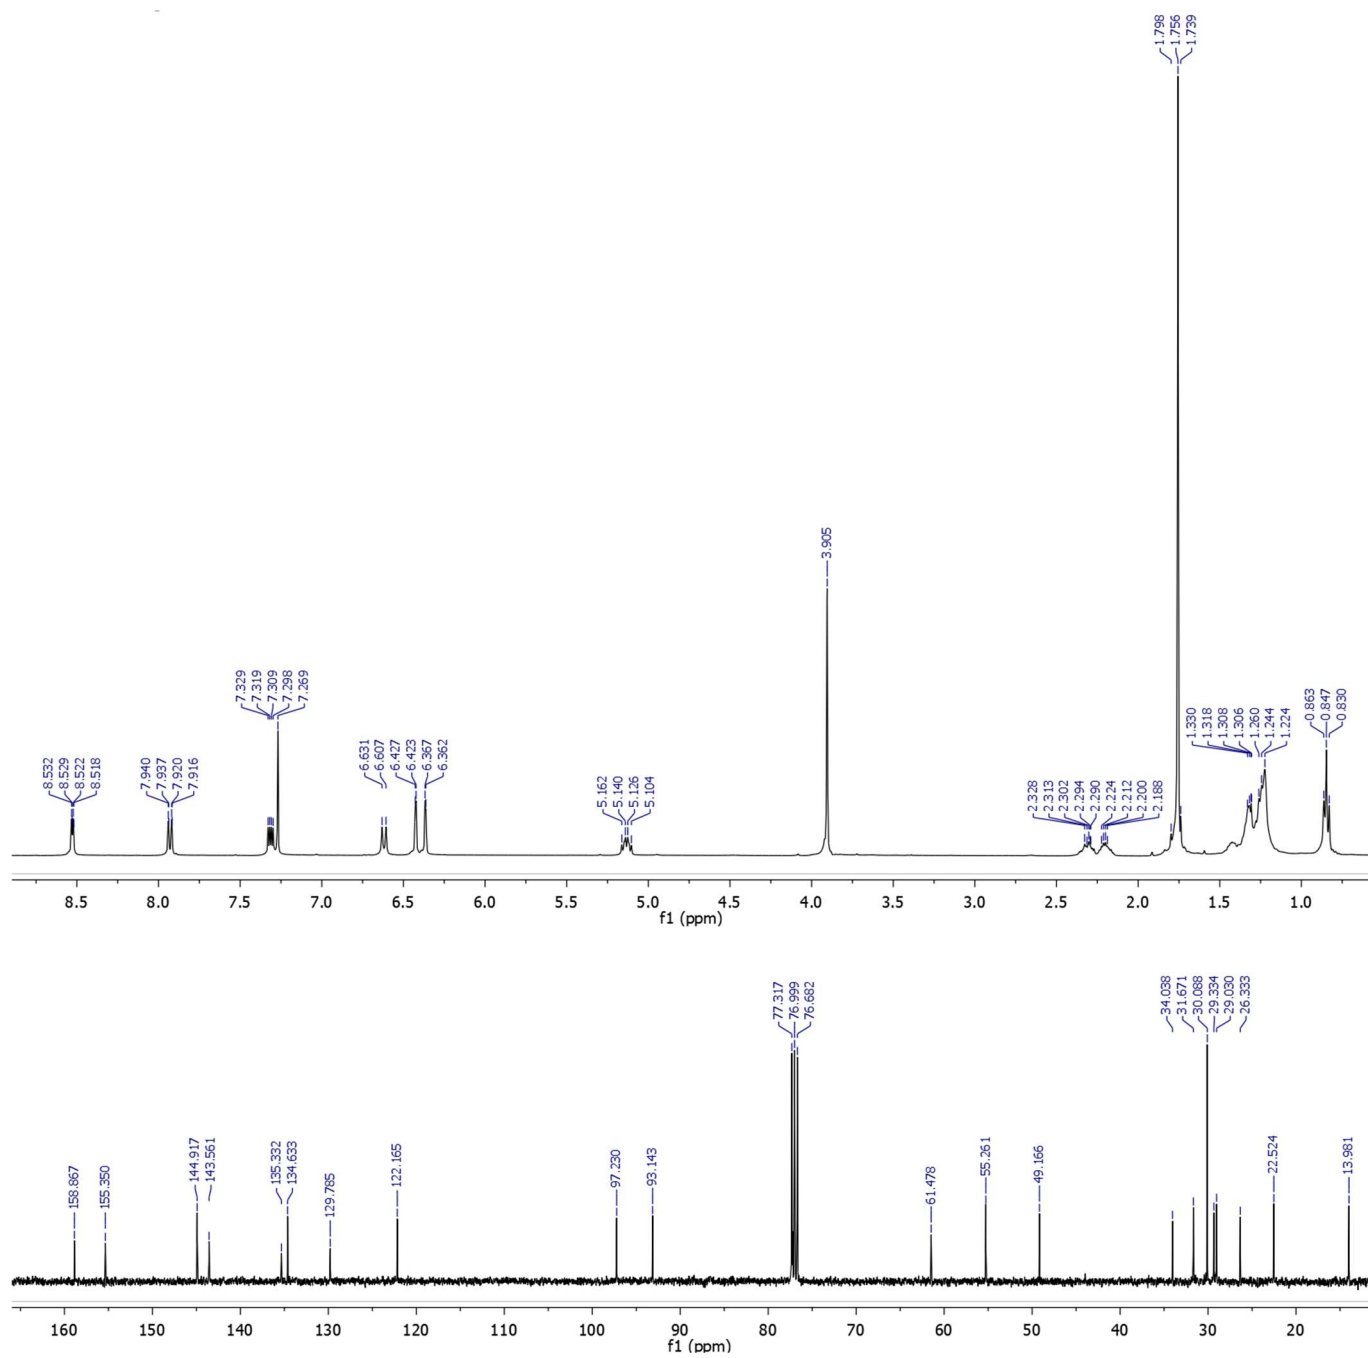

Supplement: Supplementary file 1 [file molecules-26-05530-s001.zip › molecules-1366180-supplementary.pdf]
